# Supplementary material for: On to the Next Chapter for Crop Breeding: Convergence with Data Science
Source: Preprints.org preprint supplement (doi:10.20944/preprints201903.0115.v1), 2019-03-11
Supplement: Supplementary file 1 [file supplementary]

## Sheet: Sheet1
							Supplementary Data S1 .
							Patent search performed with "Maize Inbred" and "Maize hybrid" keywords against the Google.patents data base on January 10th, 2019 : https://www.google.com/patents
							The data recovered was compiled under the following headers: patent_id,title,assignee,year,type,Company
Count of title	Column Labels						The distribution of entries per year in each of inbred and hybrid categories are plotted as a bar plot presented in Figure 1 of the manuscript.
Row Labels	hybrid	inbred	(blank)	Grand Total
0	7	6		13				Row Labels	Year	hybrid	inbred	Grand Total
1	13	7		20				87	1987	2		2
2	14	13		27				89	1989	1		1
3	7	9		16				91	1991	2	2	4
4	19	3		22				92	1992	1		1
5	32	8		40				93	1993		1	1
6	26	20		46				94	1994	4	6	10
7	59	23		82				95	1995	4	13	17
8	95	14		109				96	1996	12	13	25
9	162	16		178				97	1997	11	15	26
10	104	16		120				98	1998	13	3	16
11	118	31		149				99	1999	19	19	38
12	144	20		164				0	2000	7	6	13
13	113	29		142				1	2001	13	7	20
14	89	20		109				2	2002	14	13	27
15	37	15		52				3	2003	7	9	16
16	25	11		36				4	2004	19	3	22
17	57	3		60				5	2005	32	8	40
87	2			2				6	2006	26	20	46
89	1			1				7	2007	59	23	82
91	2	2		4				8	2008	95	14	109
92	1			1				9	2009	162	16	178
93		1		1				10	2010	104	16	120
94	4	6		10				11	2011	118	31	149
95	4	13		17				12	2012	144	20	164
96	12	13		25				13	2013	113	29	142
97	11	15		26				14	2014	89	20	109
98	13	3		16				15	2015	37	15	52
99	19	19		38				16	2016	25	11	36
(blank)								17	2017	57	3	60
(blank)
Grand Total	1190	336		1526

## Sheet: all.maize
id	title	assignee	year	type	Company
US-6046390-A	Inbred corn plant 01INL1 and seeds thereof	Dekalb Genetics Corporation	99	inbred	M
US-5859355-A	Inbred corn plant 17DHD12 and seeds thereof	Dekalb Genetics Corporation	97	inbred	M
US-6043418-A	Inbred corn plant 17INI20 and seeds thereof	Dekalb Genetics Corporation	99	inbred	M
US-2004025207-A1	Inbred corn plant 85DGD1 and seeds thereof	Dekalb Genetics Corporation	95	inbred	M
US-6355867-B1	Inbred corn plant 87ATD2 and seeds thereof	Dekalb Genetics Corporation	99	inbred	M
US-5936145-A	Inbred corn plant 87DIA4 and seeds thereof	Dekalb Genetics Corporation	97	inbred	M
US-6433261-B2	Inbred corn plant 89AHD12 and seeds thereof	Dekalb Genetics Corporation	0	inbred	M
US-6121519-A	Inbred corn plant 90DJD28 and seeds thereof	Dekalb Genetics Corporation	97	inbred	M
US-5912421-A	Inbred corn plant 91ISI6 and seeds thereof	Dekalb Genetics Corporation	98	inbred	M
US-6365806-B1	Inbred corn plant 94INK1A and seeds thereof	Dekalb Genetics Corporation	0	inbred	M
US-6031161-A	Inbred corn plant GM9215 and seeds thereof	Dekalb Genetics Corporation	98	inbred	M
US-2009282504-A1	Plants and seeds of corn hybrid ch521699	Slobodan Trifunovic	8	hybrid	M
US-7659460-B2	Plants and seeds of corn hybrid CH794587	Monsanto Technology Llc	8	hybrid	M
US-7807895-B2	Plants and seeds of corn hybrid CH819344	Monsanto Technology Llc	8	hybrid	M
US-7804010-B2	Plants and seeds of corn hybrid CH854628	Monsanto Technology Llc	8	hybrid	M
US-7807896-B2	Plants and seeds of corn hybrid CH999668	Monsanto Technology Llc	8	hybrid	M
US-2012284854-A1	Plants and seeds of corn variety cv084705	Monsanto Technology Llc	11	hybrid	M
US-9018489-B2	Plants and seeds of corn variety CV105053	Monsanto Technology Llc	13	hybrid	M
US-2008271175-A1	Plants and seeds of corn variety cv107099	Monsanto Technology Llc	7	hybrid	M
US-8450585-B2	Plants and seeds of corn variety CV234930	Monsanto Technology Llc	11	hybrid	M
US-7759559-B2	Plants and seeds of corn variety CV252827	Monsanto Technology Llc	7	hybrid	M
US-2008276330-A1	Plants and seeds of corn variety cv256816	Monsanto Technology Llc	7	hybrid	M
US-2008271181-A1	Plants and seeds of corn variety cv476579	Monsanto Technology Llc	7	hybrid	M
US-8642853-B2	Plants and seeds of corn variety CV489341	Monsanto Technology Llc	12	hybrid	M
US-8664494-B2	Plants and seeds of corn variety CV494787	Monsanto Technology Llc	12	hybrid	M
US-8716572-B2	Plants and seeds of corn variety CV589900	Monsanto Technology Llc	11	hybrid	M
US-8729365-B2	Plants and seeds of corn variety CV591103	Monsanto Technology Llc	11	hybrid	M
US-8729360-B2	Plants and seeds of corn variety CV601120	Monsanto Technology Llc	11	hybrid	M
US-2008271190-A1	Plants and seeds of corn variety cv715590	Monsanto Technology Llc	7	hybrid	M
US-8969677-B2	Plants and seeds of corn variety CV721761	Monsanto Technology Llc	13	hybrid	M
US-8722997-B2	Plants and seeds of corn variety CV927887	Monsanto Technology Llc	11	hybrid	M
US-8658873-B2	Plants and seeds of corn variety CV935324	Monsanto Technology Llc	12	hybrid	M
US-9313970-B2	Plants and seeds of corn variety CV952947	Monsanto Technology Llc	13	hybrid	M
US-6476299-B1	Plants and seeds of corn variety I181664	Dekalb Genetics Corporation	1	hybrid	M
US-7157625-B1	Plants and seeds of corn variety I325350	Monsanto Technology, L.L.C.	2	hybrid	M
US-7173172-B1	Plants and seeds of corn variety I325369	Monsanto Technology, L.L.C.	2	hybrid	M
US-9232730-B2	Plants and seeds of hybrid corn variety CH000656	Monsanto Technology Llc	14	hybrid	M
US-9332704-B2	Plants and seeds of hybrid corn variety CH002065	Monsanto Technology Llc	14	hybrid	M
US-9622440-B2	Plants and seeds of hybrid corn variety CH003028	Monsanto Technology Llc	15	hybrid	M
US-9648822-B2	Plants and seeds of hybrid corn variety CH003878	Monsanto Technology Llc	15	hybrid	M
US-2008282373-A1	Plants and seeds of hybrid corn variety ch004258	Monsanto Technology Llc	7	hybrid	M
US-9485947-B1	Plants and seeds of hybrid corn variety CH005749	Monsanto Technology Llc	15	hybrid	M
US-2012266299-A1	Plants and seeds of hybrid corn variety ch006557	Brinkman Mark J, Potrzeba Duane A, Peters Laron L	11	hybrid
US-8314309-B2	Plants and seeds of hybrid corn variety CH006642	Monsanto Technology Llc	10	hybrid
US-2011088117-A1	Plants and seeds of hybrid corn variety ch006910	Hellewell Kendell B	9	hybrid
US-8669440-B2	Plants and seeds of hybrid corn variety CH007769	Monsanto Technology Llc	12	hybrid
US-8692063-B2	Plants and seeds of hybrid corn variety CH009841	Monsanto Technology Llc	12	hybrid
US-9167791-B1	Plants and seeds of hybrid corn variety CH010506	Monsanto Technology Llc	14	hybrid
US-9301482-B2	Plants and seeds of hybrid corn variety CH010964	Monsanto Technology Llc	14	hybrid
US-9648821-B2	Plants and seeds of hybrid corn variety CH014233	Monsanto Technology Llc	15	hybrid
US-2012272378-A1	Plants and seeds of hybrid corn variety ch014641	Sandeep Bhatnagar, Brinkman Mark J, Eichelberger Kevin D, Sarah Gehlhar, Holland Gregory J, Lee Roderick D, Lubich Daniel J, Peters Laron L, Potrzeba Duane A, Ramirez De Leon Hector	11	hybrid
US-9462775-B1	Plants and seeds of hybrid corn variety CH016536	Monsanto Technology Llc	15	hybrid
US-7919696-B2	Plants and seeds of hybrid corn variety CH016740	Monsanto Technology Llc	8	hybrid
US-9629319-B2	Plants and seeds of hybrid corn variety CH016815	Monsanto Technology Llc	15	hybrid
US-9320218-B2	Plants and seeds of hybrid corn variety CH016847	Monsanto Technology Llc	13	hybrid
US-2010263073-A1	Plants and seeds of hybrid corn variety ch017484	Monsanto Technology Llc	9	hybrid
US-9549520-B2	Plants and seeds of hybrid corn variety CH018234	Monsanto Technology Llc	15	hybrid
US-2010275316-A1	Plants and seeds of hybrid corn variety ch020386	Monsanto Technology Llc	9	hybrid
US-9609823-B2	Plants and seeds of hybrid corn variety CH020441	Monsanto Technology Llc	15	hybrid
US-7807898-B2	Plants and seeds of hybrid corn variety CH020448	Monsanto Technology Llc	8	hybrid
US-2011277163-A1	Plants and seeds of hybrid corn variety ch020602	Larkins James R, Holland Gregory J	10	hybrid
US-9462773-B1	Plants and seeds of hybrid corn variety CH022572	Monsanto Technology Llc	15	hybrid
US-9210893-B2	Plants and seeds of hybrid corn variety CH024276	Monsanto Technology Llc	14	hybrid
US-9462774-B1	Plants and seeds of hybrid corn variety CH026126	Monsanto Technology Llc	15	hybrid
US-7737348-B2	Plants and seeds of hybrid corn variety CH027859	Monsanto Technology Llc	8	hybrid
US-8674191-B2	Plants and seeds of hybrid corn variety CH027901	Monsanto Technology Llc	11	hybrid
US-9018495-B2	Plants and seeds of hybrid corn variety CH028682	Monsanto Technology Llc	13	hybrid
US-2012272361-A1	Plants and seeds of hybrid corn variety ch029591	Lubich Daniel J	11	hybrid
US-9560821-B2	Plants and seeds of hybrid corn variety CH029616	Monsanto Technology Llc	15	hybrid
US-7718862-B2	Plants and seeds of hybrid corn variety CH029910	Monsanto Technology Llc	8	hybrid
US-7893327-B2	Plants and seeds of hybrid corn variety CH030594	Monsanto Technology Llc	8	hybrid
US-2012272379-A1	Plants and seeds of hybrid corn variety ch031136	Sandeep Bhatnagar, Brinkman Mark J, Eichelberger Kevin D, Sarah Gehlhar, Holland Gregory J, Lee Roderick D, Lubich Daniel J, Peters Laron L, Potrzeba Duane A, Hector Ramirez De Leon	11	hybrid
US-8889967-B2	Plants and seeds of hybrid corn variety CH031776	Monsanto Technology Llc	12	hybrid
US-2012266290-A1	Plants and seeds of hybrid corn variety ch034531	Brinkman Mark J, Cummings Donn P, Eichelberger Kevin D, Chris Eichhorn, Foresman Charles T, Holland Gregory J, Lee Roderick D, Lubich Daniel J, Peters Laron L, Peterson W Richard, Potrzeba Duane A, Ramirez De Leon Hector, Trevisan Walter L	11	hybrid
US-9622439-B2	Plants and seeds of hybrid corn variety CH034713	Monsanto Technology Llc	15	hybrid
US-7807897-B2	Plants and seeds of hybrid corn variety CH035643	Monsanto Technology Llc	8	hybrid
US-7449622-B1	Plants and seeds of hybrid corn variety CH037719	Monsanto Technology Llc	7	hybrid
US-7956250-B2	Plants and seeds of hybrid corn variety CH038350	Monsanto Technology Llc	9	hybrid
US-8319079-B2	Plants and seeds of hybrid corn variety CH039233	Monsanto Technology Llc	11	hybrid
US-7659461-B2	Plants and seeds of hybrid corn variety CH039640	Monsanto Technology Llc	8	hybrid
US-7205466-B1	Plants and seeds of hybrid corn variety CH041570	Monsanto Technology, L.L.C.	5	hybrid
US-7612268-B1	Plants and seeds of hybrid corn variety CH042217	Monsanto Technology Llc	8	hybrid
US-9462776-B1	Plants and seeds of hybrid corn variety CH042458	Monsanto Technology Llc	15	hybrid
US-9554545-B2	Plants and seeds of hybrid corn variety CH047313	Monsanto Technology Llc	15	hybrid
US-9629320-B2	Plants and seeds of hybrid corn variety CH048988	Monsanto Technology Llc	15	hybrid
US-8697945-B2	Plants and seeds of hybrid corn variety CH049609	Monsanto Technology Llc	12	hybrid
US-7429696-B1	Plants and seeds of hybrid corn variety CH052066	Monsanto Technology Llc	6	hybrid
US-7473830-B2	Plants and seeds of hybrid corn variety CH056821	Monsanto Technology Llc	7	hybrid
US-2011277121-A1	Plants and seeds of hybrid corn variety ch057021	Monsanto Technology Llc	10	hybrid
US-7615697-B2	Plants and seeds of hybrid corn variety CH060503	Monsanto Technology Llc	7	hybrid
US-9072259-B2	Plants and seeds of hybrid corn variety CH066104	Monsanto Technology Llc	13	hybrid
US-9313987-B2	Plants and seeds of hybrid corn variety CH066626	Monsanto Technology Llc	14	hybrid
US-7390946-B1	Plants and seeds of hybrid corn variety CH071844	Monsanto Technology Llc	7	hybrid
US-9232731-B2	Plants and seeds of hybrid corn variety CH072226	Monsanto Technology Llc	14	hybrid
US-7804011-B2	Plants and seeds of hybrid corn variety CH075709	Monsanto Technology Llc	8	hybrid
US-9237713-B2	Plants and seeds of hybrid corn variety CH076044	Monsanto Technology Llc	14	hybrid
US-9313986-B2	Plants and seeds of hybrid corn variety CH080093	Monsanto Technology Llc	14	hybrid
US-2008282374-A1	Plants and seeds of hybrid corn variety ch080290	Monsanto Technology Llc	7	hybrid
US-9622441-B2	Plants and seeds of hybrid corn variety CH080520	Monsanto Technology Llc	15	hybrid
US-2012266288-A1	Plants and seeds of hybrid corn variety ch083866	Michael Dragonuk, Chris Eichhorn, Frederickson L John, Peter Guzman, Holland Gregory J, Peters Laron L, Hector Ramirez De Leon, Souder Christopher L	11	hybrid
US-8604318-B2	Plants and seeds of hybrid corn variety CH085530	Monsanto Technology Llc	12	hybrid
US-2014338020-A1	Plants and seeds of hybrid corn variety ch086914	Monsanto Technology Llc	13	hybrid
US-8076552-B2	Plants and seeds of hybrid corn variety CH088316	Monsanto Technology Llc	9	hybrid
US-2010293644-A1	Plants and seeds of hybrid corn variety ch088433	Monsanto Technology Llc	9	hybrid
US-9485950-B1	Plants and seeds of hybrid corn variety CH089236	Monsanto Technology Llc	15	hybrid
US-8710332-B2	Plants and seeds of hybrid corn variety CH089600	Monsanto Technology Llc	12	hybrid
US-9554540-B2	Plants and seeds of hybrid corn variety CH089982	Monsanto Technology Llc	15	hybrid
US-9232744-B2	Plants and seeds of hybrid corn variety CH090746	Monsanto Technology Llc	14	hybrid
US-2012284833-A1	Plants and seeds of hybrid corn variety ch091735	Bergemann Scott A, Birru Fufa H, Faue Allen C, Stelpflug Richard G	11	hybrid
US-8207430-B2	Plants and seeds of hybrid corn variety CH091754	Monsanto Technology Llc	10	hybrid
US-2011283411-A1	Plants and seeds of hybrid corn variety ch092965	Larkins James R, Holland Gregory J	10	hybrid
US-7259303-B1	Plants and seeds of hybrid corn variety CH093858	Monsanto Technology Llc	5	hybrid
US-8884131-B2	Plants and seeds of hybrid corn variety CH095541	Monsanto Technology Llc	12	hybrid
US-2012266305-A1	Plants and seeds of hybrid corn variety ch095686	Mcelroy Jeffrey L	11	hybrid
US-2012284819-A1	Plants and seeds of hybrid corn variety ch096048	Olsen Michael S	11	hybrid
US-9237721-B2	Plants and seeds of hybrid corn variety CH097633	Monsanto Technology Llc	14	hybrid
US-2012266293-A1	Plants and seeds of hybrid corn variety ch097839	Scott Bergemann, Birru Fufa H, Chris Eichhorn, Frederickson L John, Peter Guzman, Peters Laron L, Stelpflug Richard G	11	hybrid
US-8729358-B2	Plants and seeds of hybrid corn variety CH098773	Monsanto Technology Llc	11	hybrid
US-9456565-B2	Plants and seeds of hybrid corn variety CH099375	Monsanto Technology Llc	13	hybrid
US-9532541-B2	Plants and seeds of hybrid corn variety CH099686	Monsanto Technology Llc	15	hybrid
US-7608763-B2	Plants and seeds of hybrid corn variety CH100833	Monsanto Technology Llc	7	hybrid
US-9532542-B2	Plants and seeds of hybrid corn variety CH102353	Monsanto Technology Llc	15	hybrid
US-2012284823-A1	Plants and seeds of hybrid corn variety ch103769	Michael Dragonuk, Chris Eichhorn, Frederickson L John, Peter Guzman, Holland Gregory J, Peters Laron L, Ramirez De Leon Hector, Souder Christopher L	11	hybrid
US-8344219-B2	Plants and seeds of hybrid corn variety CH105639	Monsanto Technology Llc	10	hybrid
US-8039713-B2	Plants and seeds of hybrid corn variety CH105778	Monsanto Technology Llc	9	hybrid
US-2011283408-A1	Plants and seeds of hybrid corn variety ch107749	Birru Fufa H	10	hybrid
US-2010275292-A1	Plants and seeds of hybrid corn variety ch110135	Monsanto Technology Llc	9	hybrid
US-8273969-B2	Plants and seeds of hybrid corn variety CH110748	Monsanto Technology Llc	10	hybrid
US-2012284848-A1	Plants and seeds of hybrid corn variety ch110846	Sandeep Bhatnagar, Brinkman Mark J, Eichelberger Kevin D, Sarah Gehlhar, Holland Gregory J, Lee Roderick D, Lubich Daniel J, Peters Laron L, Potrzeba Duane A, Hector Ramirez De Leon	11	hybrid
US-9468178-B1	Plants and seeds of hybrid corn variety CH111760	Monsanto Technology Llc	15	hybrid
US-8319059-B2	Plants and seeds of hybrid corn variety CH113132	Monsanto Technology Llc	10	hybrid
US-2011277151-A1	Plants and seeds of hybrid corn variety ch115012	Monsanto Technology Llc	10	hybrid
US-2011277174-A1	Plants and seeds of hybrid corn variety ch116894	Monsanto Technology Llc	10	hybrid
US-2010293639-A1	Plants and seeds of hybrid corn variety ch117231	Monsanto Technology Llc	9	hybrid
US-7638693-B2	Plants and seeds of hybrid corn variety CH120555	Monsanto Technology Llc	8	hybrid
US-8324483-B2	Plants and seeds of hybrid corn variety CH120777	Monsanto Technology Llc	11	hybrid
US-9313974-B2	Plants and seeds of hybrid corn variety CH123841	Monsanto Technology Llc	13	hybrid
US-8604315-B2	Plants and seeds of hybrid corn variety CH126458	Monsanto Technology Llc	12	hybrid
US-9554544-B2	Plants and seeds of hybrid corn variety CH126661	Monsanto Technology Llc	15	hybrid
US-9585328-B2	Plants and seeds of hybrid corn variety CH127192	Monsanto Technology Llc	15	hybrid
US-7952004-B2	Plants and seeds of hybrid corn variety CH127588	Monsanto Technology Llc	9	hybrid
US-8344217-B2	Plants and seeds of hybrid corn variety CH128176	Monsanto Technology Llc	10	hybrid
US-9072268-B2	Plants and seeds of hybrid corn variety CH128259	Monsanto Technology Llc	13	hybrid
US-9072255-B2	Plants and seeds of hybrid corn variety CH129909	Monsanto Technology Llc	13	hybrid
US-8884140-B1	Plants and seeds of hybrid corn variety CH130037	Monsanto Technology Llc	13	hybrid
US-7612266-B2	Plants and seeds of hybrid corn variety CH130744	Monsanto Technology Llc	7	hybrid
US-9456563-B2	Plants and seeds of hybrid corn variety CH131608	Monsanto Technology Llc	13	hybrid
US-8502046-B2	Plants and seeds of hybrid corn variety CH131799	Monsanto Technology Llc	11	hybrid
US-9232729-B2	Plants and seeds of hybrid corn variety CH134367	Monsanto Technology Llc	14	hybrid
US-8039707-B2	Plants and seeds of hybrid corn variety CH134921	Monsanto Technology Llc	9	hybrid
US-2010293633-A1	Plants and seeds of hybrid corn variety ch136255	Monsanto Technology Llc	9	hybrid
US-8829310-B2	Plants and seeds of hybrid corn variety CH139811	Monsanto Technology Llc	12	hybrid
US-8669439-B2	Plants and seeds of hybrid corn variety CH140757	Monsanto Technology Llc	12	hybrid
US-8816175-B2	Plants and seeds of hybrid corn variety CH143941	Monsanto Technology Llc	12	hybrid
US-7504566-B1	Plants and seeds of hybrid corn variety CH144219	Monsanto Technology Llc	6	hybrid
US-2012272368-A1	Plants and seeds of hybrid corn variety ch146292	Jon Popi	11	hybrid
US-9462772-B1	Plants and seeds of hybrid corn variety CH146577	Monsanto Technology Llc	15	hybrid
US-8604319-B2	Plants and seeds of hybrid corn variety CH147061	Monsanto Technology Llc	12	hybrid
US-7956249-B2	Plants and seeds of hybrid corn variety CH147656	Monsanto Technology Llc	9	hybrid
US-2008282398-A1	Plants and seeds of hybrid corn variety ch148845	Monsanto Technology Llc	7	hybrid
US-8912410-B2	Plants and seeds of hybrid corn variety CH149728	Monsanto Technology Llc	12	hybrid
US-9560820-B2	Plants and seeds of hybrid corn variety CH149894	Monsanto Technology Llc	15	hybrid
US-7872177-B2	Plants and seeds of hybrid corn variety CH151527	Monsanto Technology Llc	8	hybrid
US-2012272356-A1	Plants and seeds of hybrid corn variety ch154632	Boerboom Marvin L	11	hybrid
US-2012284820-A1	Plants and seeds of hybrid corn variety ch154865	Bergemann Scott A, Birru Fufa H, Chris Eichhorn, Frederickson L John, Peter Guzman, Souder Christopher L, Stelpflug Richard G	11	hybrid
US-7714215-B2	Plants and seeds of hybrid corn variety CH155784	Monsanto Technology Llc	8	hybrid
US-2010275299-A1	Plants and seeds of hybrid corn variety ch156941	Monsanto Technology Llc	9	hybrid
US-9462771-B1	Plants and seeds of hybrid corn variety CH157113	Monsanto Technology Llc	15	hybrid
US-9585327-B2	Plants and seeds of hybrid corn variety CH157613	Monsanto Technology Llc	15	hybrid
US-2012266282-A1	Plants and seeds of hybrid corn variety ch157635	Sandeep Bhatnagar, Brinkman Mark J, Eichelberger Kevin D, Sarah Gehlhar, Holland Gregory J, Lee Roderick D, Lubich Daniel J, Peters Laron L, Potrzeba Duane A, Ramirez De Leon Hector	11	hybrid
US-8461433-B2	Plants and seeds of hybrid corn variety CH158013	Monsanto Technology Llc	11	hybrid
US-7615696-B2	Plants and seeds of hybrid corn variety CH160029	Monsanto Technology Llc	7	hybrid
US-2013291140-A1	Plants and seeds of hybrid corn variety ch160660	Scott A. Bergemann, Fufa H. Birru, Peter Guzman, Richard G. Stelpflug	12	hybrid
US-9456575-B1	Plants and seeds of hybrid corn variety CH160864	Monsanto Technology Llc	15	hybrid
US-8692094-B2	Plants and seeds of hybrid corn variety CH162086	Monsanto Technology Llc	12	hybrid
US-8829309-B2	Plants and seeds of hybrid corn variety CH162504	Monsanto Technology Llc	12	hybrid
US-7714214-B2	Plants and seeds of hybrid corn variety CH163678	Monsanto Technology Llc	8	hybrid
US-2012266297-A1	Plants and seeds of hybrid corn variety ch163712	Slobodan Trifunovic, Trevisan Walter L	11	hybrid
US-9232706-B2	Plants and seeds of hybrid corn variety CH164536	Monsanto Technology Llc	13	hybrid
US-9456574-B1	Plants and seeds of hybrid corn variety CH164586	Monsanto Technology Llc	15	hybrid
US-8946525-B2	Plants and seeds of hybrid corn variety CH164731	Monsanto Technology Llc	12	hybrid
US-9578840-B2	Plants and seeds of hybrid corn variety CH164736	Monsanto Technology Llc	15	hybrid
US-9578841-B2	Plants and seeds of hybrid corn variety CH165077	Monsanto Technology Llc	15	hybrid
US-2012266289-A1	Plants and seeds of hybrid corn variety ch165218	Slobodan Trifunovic	11	hybrid
US-7700858-B2	Plants and seeds of hybrid corn variety CH168616	Monsanto Technology Llc	7	hybrid
US-7714210-B2	Plants and seeds of hybrid corn variety CH169228	Monsanto Technology Llc	8	hybrid
US-8188351-B2	Plants and seeds of hybrid corn variety CH174075	Monsanto Technology Llc	10	hybrid
US-9585324-B2	Plants and seeds of hybrid corn variety CH174607	Monsanto Technology Llc	15	hybrid
US-2013291160-A1	Plants and seeds of hybrid corn variety ch175075	Belgin Cukadar	12	hybrid
US-2010269206-A1	Plants and seeds of hybrid corn variety ch175773	Monsanto Technology Llc	9	hybrid
US-8314308-B2	Plants and seeds of hybrid corn variety CH183781	Monsanto Technology Llc	10	hybrid
US-9167777-B2	Plants and seeds of hybrid corn variety CH185329	Monsanto Technology Llc	13	hybrid
US-2012284827-A1	Plants and seeds of hybrid corn variety ch186896	Brinkman Mark J, Michael Dragonuk, Eichelberger Kevin D, Chris Eichhorn, Sarah Gehlhar, Peter Guzman, Holland Gregory J, Lubich Daniel J, Peters Laron L, Potrzeba Duane A, Ramirez De Leon Hector, Souder Christopher L	11	hybrid
US-7642433-B2	Plants and seeds of hybrid corn variety CH187789	Monsanto Technology Llc	8	hybrid
US-2010293643-A1	Plants and seeds of hybrid corn variety ch189311	Monsanto Technology Llc	9	hybrid
US-9210889-B2	Plants and seeds of hybrid corn variety CH191893	Monsanto Technology Llc	14	hybrid
US-7943835-B2	Plants and seeds of hybrid corn variety CH192255	Monsanto Technology Llc	9	hybrid
US-2008282418-A1	Plants and seeds of hybrid corn variety ch193307	Monsanto Technology Llc	7	hybrid
US-9320231-B2	Plants and seeds of hybrid corn variety CH194913	Monsanto Technology Llc	14	hybrid
US-8692056-B2	Plants and seeds of hybrid corn variety CH199546	Monsanto Technology Llc	12	hybrid
US-7714209-B2	Plants and seeds of hybrid corn variety CH200570	Monsanto Technology Llc	8	hybrid
US-9072263-B2	Plants and seeds of hybrid corn variety CH201386	Monsanto Technology Llc	13	hybrid
US-2012284834-A1	Plants and seeds of hybrid corn variety ch203254	Olsen Michael S	11	hybrid
US-7999157-B2	Plants and seeds of hybrid corn variety CH204002	Monsanto Technology Llc	9	hybrid
US-8889973-B1	Plants and seeds of hybrid corn variety CH208467	Monsanto Technology Llc	13	hybrid
US-2010275291-A1	Plants and seeds of hybrid corn variety ch210161	Monsanto Technology Llc	9	hybrid
US-2012272367-A1	Plants and seeds of hybrid corn variety ch212179	Scott Bergemann, Birru Fufa H, Faue Allen C, Stepflug Richard G	11	hybrid
US-2010293641-A1	Plants and seeds of hybrid corn variety ch212692	Peters Laron L, Stangland Gary R	9	hybrid
US-7939733-B2	Plants and seeds of hybrid corn variety CH213160	Monsanto Technology Llc	9	hybrid
US-8969683-B2	Plants and seeds of hybrid corn variety CH213919	Monsanto Technology Llc	13	hybrid
US-2010287648-A1	Plants and seeds of hybrid corn variety ch213992	Monsanto Technology Llc	9	hybrid
US-8969681-B2	Plants and seeds of hybrid corn variety CH217116	Monsanto Technology Llc	13	hybrid
US-8692055-B2	Plants and seeds of hybrid corn variety CH218560	Monsanto Technology Llc	12	hybrid
US-2012284821-A1	Plants and seeds of hybrid corn variety ch218871	Michael Dragonuk, Chris Eichhorn, Frederickson L John, Peter Guzman, Holland Gregory J, Peters Laron L, Ramirez De Leon Hector, Souder Christopher L	11	hybrid
US-9220217-B2	Plants and seeds of hybrid corn variety CH220563	Monsanto Technology Llc	13	hybrid
US-9210890-B2	Plants and seeds of hybrid corn variety CH220700	Monsanto Technology Llc	14	hybrid
US-2014344966-A1	Plants and seeds of hybrid corn variety ch225896	Monsanto Technology Llc	13	hybrid
US-2011277092-A1	Plants and seeds of hybrid corn variety ch226366	Monsanto Technology Llc	10	hybrid
US-2009288190-A1	Plants and seeds of hybrid corn variety ch226886	Jon Popi	8	hybrid
US-8330019-B2	Plants and seeds of hybrid corn variety CH227660	Monsanto Technology Llc	10	hybrid
US-7388140-B1	Plants and seeds of hybrid corn variety CH231398	Monsanto Technology Llc	6	hybrid
US-8519220-B2	Plants and seeds of hybrid corn variety CH233570	Monsanto Technology Llc	11	hybrid
US-2014344980-A1	Plants and seeds of hybrid corn variety ch233570	Monsanto Technology Llc	13	hybrid
US-7655846-B2	Plants and seeds of hybrid corn variety CH234162	Monsanto Technology Llc	8	hybrid
US-8878026-B2	Plants and seeds of hybrid corn variety CH235629	Monsanto Technology Llc	12	hybrid
US-9210872-B2	Plants and seeds of hybrid corn variety CH236451	Monsanto Technology Llc	13	hybrid
US-2012284824-A1	Plants and seeds of hybrid corn variety ch237197	Sandeep Bhatnagar, Brinkman Mark J, Eichelberger Kevin D, Sarah Gehlhar, Holland Gregory J, Lee Roderick D, Lubich Daniel J, Peters Laron L, Potrzeba Duane A, Ramirez De Leon Hector	11	hybrid
US-8716578-B2	Plants and seeds of hybrid corn variety CH237946	Monsanto Technology Llc	12	hybrid
US-7994404-B2	Plants and seeds of hybrid corn variety CH238590	Monsanto Technology Llc	9	hybrid
US-2010275302-A1	Plants and seeds of hybrid corn variety ch244084	Mcelroy Jeffrey L	9	hybrid
US-8692057-B2	Plants and seeds of hybrid corn variety CH244692	Monsanto Technology Llc	12	hybrid
US-7683241-B2	Plants and seeds of hybrid corn variety CH244754	Monsanto Technology Llc	7	hybrid
US-7737345-B2	Plants and seeds of hybrid corn variety CH246180	Monsanto Technology Llc	8	hybrid
US-8263839-B2	Plants and seeds of hybrid corn variety CH247148	Monsanto Technology Llc	10	hybrid
US-2012278926-A1	Plants and seeds of hybrid corn variety ch247856	Michael Dragonuk, Chris Eichhorn, Peter Guzman, Holland Gregory J, Peters Laron L, Hector Ramirez De Leon, Souder Christopher L	11	hybrid
US-8829308-B2	Plants and seeds of hybrid corn variety CH250155	Monsanto Technology Llc	12	hybrid
US-9024157-B2	Plants and seeds of hybrid corn variety CH250410	Monsanto Technology Llc	13	hybrid
US-9072254-B2	Plants and seeds of hybrid corn variety CH254441	Monsanto Technology Llc	13	hybrid
US-7208663-B1	Plants and seeds of hybrid corn variety CH255138	Monsanto Technology, L.L.C.	5	hybrid
US-8710314-B2	Plants and seeds of hybrid corn variety CH260114	Monsanto Technology Llc	11	hybrid
US-9258970-B2	Plants and seeds of hybrid corn variety CH260320	Monsanto Technology Llc	14	hybrid
US-7723585-B2	Plants and seeds of hybrid corn variety CH261787	Monsanto Technology Llc	8	hybrid
US-9125368-B2	Plants and seeds of hybrid corn variety CH266907	Monsanto Technology Llc	13	hybrid
US-7592520-B2	Plants and seeds of hybrid corn variety CH267427	Monsanto Technology Llc	7	hybrid
US-7759561-B2	Plants and seeds of hybrid corn variety CH269851	Monsanto Technology Llc	8	hybrid
US-8878028-B2	Plants and seeds of hybrid corn variety CH273465	Monsanto Technology Llc	12	hybrid
US-8049083-B2	Plants and seeds of hybrid corn variety CH277420	Monsanto Technology Llc	9	hybrid
US-2010293635-A1	Plants and seeds of hybrid corn variety ch279302	Stelpflug Richard G, John Frederickson	9	hybrid
US-9125370-B2	Plants and seeds of hybrid corn variety CH282732	Monsanto Technology Llc	13	hybrid
US-2012278915-A1	Plants and seeds of hybrid corn variety ch283291	Bergemann Scott A, Birru Fufa H, Frederickson L John, Peter Guzman, Stelpflug Richard G	11	hybrid
US-9258969-B2	Plants and seeds of hybrid corn variety CH286065	Monsanto Technology Llc	14	hybrid
US-9232737-B2	Plants and seeds of hybrid corn variety CH286579	Monsanto Technology Llc	14	hybrid
US-9232726-B2	Plants and seeds of hybrid corn variety CH286938	Monsanto Technology Llc	14	hybrid
US-8294000-B2	Plants and seeds of hybrid corn variety CH287946	Monsanto Technology Llc	10	hybrid
US-2009288188-A1	Plants and seeds of hybrid corn variety ch288157	Monsanto Technology Llc	8	hybrid
US-2009288198-A1	Plants and seeds of hybrid corn variety ch288631	Monsanto Technology Llc	8	hybrid
US-2012278927-A1	Plants and seeds of hybrid corn variety ch289619	Michael Dragonuk, Chris Eichhorn, Peter Guzman, Holland Gregory J, Peters Laron L, Hector Ramirez De Leon, Souder Christopher L	11	hybrid
US-8471129-B2	Plants and seeds of hybrid corn variety CH290586	Monsanto Technology Llc	11	hybrid
US-7943833-B2	Plants and seeds of hybrid corn variety CH291585	Monsanto Technology Llc	9	hybrid
US-8319080-B1	Plants and seeds of hybrid corn variety CH291635	Monsanto Technology Llc	11	hybrid
US-9232743-B2	Plants and seeds of hybrid corn variety CH292573	Monsanto Technology Llc	14	hybrid
US-8212131-B2	Plants and seeds of hybrid corn variety CH292582	Monsanto Technology Llc	10	hybrid
US-2010306871-A1	Plants and seeds of hybrid corn variety ch293284	Monsanto Technology Llc	9	hybrid
US-9072233-B2	Plants and seeds of hybrid corn variety CH296980	Monsanto Technology Llc	12	hybrid
US-7655844-B2	Plants and seeds of hybrid corn variety CH298165	Monsanto Technology Llc	7	hybrid
US-2010275311-A1	Plants and seeds of hybrid corn variety ch300898	Holland Gregory J, Larkins James R	9	hybrid
US-8319052-B2	Plants and seeds of hybrid corn variety CH303297	Monsanto Technology Llc	10	hybrid
US-2012266286-A1	Plants and seeds of hybrid corn variety ch306373	Monsanto Technology Llc	11	hybrid
US-9237727-B2	Plants and seeds of hybrid corn variety CH306764	Monsanto Technology Llc	14	hybrid
US-2010263071-A1	Plants and seeds of hybrid corn variety ch309839	Monsanto Technology Llc	9	hybrid
US-8524977-B2	Plants and seeds of hybrid corn variety CH310852	Monsanto Technology Llc	11	hybrid
US-8697944-B2	Plants and seeds of hybrid corn variety CH312088	Monsanto Technology Llc	12	hybrid
US-2012272357-A1	Plants and seeds of hybrid corn variety ch315525	Scott Bergemann, Birru Fufa H, Chris Eichhorn, Frederickson L John, Peter Guzman, Souder Christopher L, Stelpflug Richard G	11	hybrid
US-8692062-B2	Plants and seeds of hybrid corn variety CH318441	Monsanto Technology Llc	12	hybrid
US-9210906-B2	Plants and seeds of hybrid corn variety CH322021	Monsanto Technology Llc	14	hybrid
US-7632990-B2	Plants and seeds of hybrid corn variety CH323024	Monsanto Technology Llc	7	hybrid
US-7709708-B2	Plants and seeds of hybrid corn variety CH323945	Monsanto Technology Llc	7	hybrid
US-2012272358-A1	Plants and seeds of hybrid corn variety ch324145	Brinkman Mark J, Micheal Dragonuk, Eichelberger Kevin D, Chris Eichhorn, Sarah Gehlhar, Peter Guzman, Holland Gregory J, Lubich Daniel J, Peters Laron L, Potrzeba Duane A, Leon Hector Ramirez De, Souder Christopher L	11	hybrid
US-9237714-B2	Plants and seeds of hybrid corn variety CH325165	Monsanto Technology Llc	14	hybrid
US-2014359889-A1	Plants and seeds of hybrid corn variety ch325995	Monsanto Technology Llc	13	hybrid
US-8604320-B2	Plants and seeds of hybrid corn variety CH327446	Monsanto Technology Llc	12	hybrid
US-8937231-B2	Plants and seeds of hybrid corn variety CH327469	Monsanto Technology Llc	12	hybrid
US-9210868-B2	Plants and seeds of hybrid corn variety CH328692	Monsanto Technology Llc	13	hybrid
US-7189906-B1	Plants and seeds of hybrid corn variety CH331298	Monsanto Technology, L.L.C.	5	hybrid
US-2012272369-A1	Plants and seeds of hybrid corn variety ch332645	Birru Fufa H, Faue Allen C, Stelpflug Richard G	11	hybrid
US-7714213-B2	Plants and seeds of hybrid corn variety CH333290	Monsanto Technology Llc	8	hybrid
US-8878033-B1	Plants and seeds of hybrid corn variety CH333708	Monsanto Technology Llc	13	hybrid
US-9072261-B2	Plants and seeds of hybrid corn variety CH334303	Monsanto Technology Llc	13	hybrid
US-8710313-B2	Plants and seeds of hybrid corn variety CH336383	Monsanto Technology Llc	11	hybrid
US-2010287651-A1	Plants and seeds of hybrid corn variety ch337710	Monsanto Technology Llc	9	hybrid
US-7816591-B1	Plants and seeds of hybrid corn variety CH339402	Monsanto Technology Llc	9	hybrid
US-8969685-B2	Plants and seeds of hybrid corn variety CH342100	Monsanto Technology Llc	13	hybrid
US-9167792-B1	Plants and seeds of hybrid corn variety CH344150	Monsanto Technology Llc	14	hybrid
US-8962951-B2	Plants and seeds of hybrid corn variety CH344455	Monsanto Technology Llc	12	hybrid
US-8076554-B2	Plants and seeds of hybrid corn variety CH345220	Monsanto Technology Llc	9	hybrid
US-7511203-B1	Plants and seeds of hybrid corn variety CH346850	Monsanto Technology Llc	6	hybrid
US-7956251-B2	Plants and seeds of hybrid corn variety CH347605	Monsanto Technology Llc	9	hybrid
US-8697943-B2	Plants and seeds of hybrid corn variety CH349198	Monsanto Technology Llc	12	hybrid
US-7718866-B2	Plants and seeds of hybrid corn variety CH350141	Monsanto Technology Llc	8	hybrid
US-8053648-B2	Plants and seeds of hybrid corn variety CH353606	Monsanto Technology Llc	9	hybrid
US-8134057-B2	Plants and seeds of hybrid corn variety CH354074	Monsanto Technology Llc	10	hybrid
US-8269079-B2	Plants and seeds of hybrid corn variety CH354755	Monsanto Technology Llc	10	hybrid
US-9301479-B2	Plants and seeds of hybrid corn variety CH355122	Monsanto Technology Llc	14	hybrid
US-2012272364-A1	Plants and seeds of hybrid corn variety ch355160	Faue Allen C, Mateo Rafael A, Stelpflug Richard G	11	hybrid
US-7718869-B1	Plants and seeds of hybrid corn variety CH355718	Monsanto Technology Llc	9	hybrid
US-8450582-B2	Plants and seeds of hybrid corn variety CH356005	Monsanto Technology Llc	10	hybrid
US-8637749-B2	Plants and seeds of hybrid corn variety CH357331	Monsanto Technology Llc	12	hybrid
US-2012284836-A1	Plants and seeds of hybrid corn variety ch357620	Bergemann Scott A, Birru Fufa H, Chris Eichhorn, Frederickson L John, Peter Guzman, Souder Christopher L, Stelpflug Richard G	11	hybrid
US-7906714-B2	Plants and seeds of hybrid corn variety CH359108	Monsanto Technology Llc	8	hybrid
US-7915494-B2	Plants and seeds of hybrid corn variety CH361230	Monsanto Technology Llc	8	hybrid
US-7863505-B2	Plants and seeds of hybrid corn variety CH363113	Monsanto Technology Llc	8	hybrid
US-8309829-B2	Plants and seeds of hybrid corn variety CH363245	Monsanto Technology Llc	11	hybrid
US-9237726-B2	Plants and seeds of hybrid corn variety CH364361	Monsanto Technology Llc	14	hybrid
US-7750215-B2	Plants and seeds of hybrid corn variety CH365545	Monsanto Technology Llc	8	hybrid
US-9167790-B1	Plants and seeds of hybrid corn variety CH366635	Monsanto Technology Llc	14	hybrid
US-8710331-B2	Plants and seeds of hybrid corn variety CH367819	Monsanto Technology Llc	12	hybrid
US-9220218-B2	Plants and seeds of hybrid corn variety CH369193	Monsanto Technology Llc	13	hybrid
US-8884141-B1	Plants and seeds of hybrid corn variety CH374512	Monsanto Technology Llc	13	hybrid
US-8263838-B2	Plants and seeds of hybrid corn variety CH374777	Monsanto Technology Llc	10	hybrid
US-2012284835-A1	Plants and seeds of hybrid corn variety ch375393	Bergemann Scott A, Birru Fufa H, Faue Allen C, Stelpflug Richard G, Frederickson L John, Mateo Rafael A	11	hybrid
US-9072265-B2	Plants and seeds of hybrid corn variety CH375520	Monsanto Technology Llc	13	hybrid
US-8604314-B2	Plants and seeds of hybrid corn variety CH379150	Monsanto Technology Llc	12	hybrid
US-8581080-B1	Plants and seeds of hybrid corn variety CH379602	Monsanto Technology Llc	12	hybrid
US-7592525-B2	Plants and seeds of hybrid corn variety CH382226	Monsanto Technology Llc	7	hybrid
US-9072269-B2	Plants and seeds of hybrid corn variety CH382242	Monsanto Technology Llc	13	hybrid
US-2012266276-A1	Plants and seeds of hybrid corn variety ch382468	Belgin Cukadar	11	hybrid
US-2012284850-A1	Plants and seeds of hybrid corn variety ch384418	Sandeep Bhatnagar, Brinkman Mark J, Eichelberger Kevin D, Sarah Gehlhar, Holland Gregory J, Lee Roderick D, Lubich Daniel J, Peters Laron L, Potrzeba Duane A, Ramirez De Leon Hector	11	hybrid
US-2010275301-A1	Plants and seeds of hybrid corn variety ch388736	Monsanto Technology Llc	9	hybrid
US-7268279-B1	Plants and seeds of hybrid corn variety CH389090	Monsanto Technology Llc	5	hybrid
US-2012284841-A1	Plants and seeds of hybrid corn variety ch389253	Brinkman Mark J, Michael Dragonuk, Eichelberger Kevin D, Chris Eichhorn, Sarah Gehlhar, Peter Guzman, Holland Gregory J, Lubich Daniel J, Peters Laron L, Potrzeba Duane A, Leon Hector Ramirez De, Souder Christopher L	11	hybrid
US-9237725-B2	Plants and seeds of hybrid corn variety CH391121	Monsanto Technology Llc	14	hybrid
US-2012266272-A1	Plants and seeds of hybrid corn variety ch391357	Michael Dragonuk, Chris Eichhorn, Frederickson L John, Peter Guzman, Holland Gregory J, Peters Laron L, Hector Ramirez De Leon, Souder Christopher L	11	hybrid
US-9237719-B2	Plants and seeds of hybrid corn variety CH392881	Monsanto Technology Llc	14	hybrid
US-8039706-B2	Plants and seeds of hybrid corn variety CH393009	Monsanto Technology Llc	9	hybrid
US-8822792-B2	Plants and seeds of hybrid corn variety CH393432	Monsanto Technology Llc	12	hybrid
US-2008282395-A1	Plants and seeds of hybrid corn variety ch394140	Monsanto Technology Llc	7	hybrid
US-8969682-B2	Plants and seeds of hybrid corn variety CH395417	Monsanto Technology Llc	13	hybrid
US-2012284830-A1	Plants and seeds of hybrid corn variety ch397792	Sandeep Bhatnagar, Brinkman Mark J, Eichelberger Kevin D, Sarah Gehlhar, Holland Gregory J, Lee Roderick D, Lubich Daniel J, Peters Laron L, Potrzeba Duane A, Ramirez De Leon Hector	11	hybrid
US-9232735-B2	Plants and seeds of hybrid corn variety CH399948	Monsanto Technology Llc	14	hybrid
US-7626101-B2	Plants and seeds of hybrid corn variety CH402830	Monsanto Technology Llc	7	hybrid
US-2012266275-A1	Plants and seeds of hybrid corn variety ch403048	Sandeep Bhatnagar, Brinkman Mark J, Eichelberger Kevin D, Sarah Gehlhar, Holland Gregory J, Lee Roderick D, Lubich Daniel J, Peters Laron L, Potrzeba Duane A, Hector Ramirez De Leon	11	hybrid
US-7256335-B1	Plants and seeds of hybrid corn variety CH403115	Monsanto Technology Llc	6	hybrid
US-8940980-B2	Plants and seeds of hybrid corn variety CH406206	Monsanto Technology Llc	12	hybrid
US-2010275317-A1	Plants and seeds of hybrid corn variety ch406625	Monsanto Technology Llc	9	hybrid
US-7605311-B2	Plants and seeds of hybrid corn variety CH407425	Monsanto Technology Llc	7	hybrid
US-8525000-B2	Plants and seeds of hybrid corn variety CH407490	Monsanto Technology Llc	11	hybrid
US-7816589-B2	Plants and seeds of hybrid corn variety CH408813	Monsanto Technology Llc	8	hybrid
US-2014338029-A1	Plants and seeds of hybrid corn variety ch408889	Monsanto Technology Llc	13	hybrid
US-2017094927-A1	Plants and seeds of hybrid corn variety ch408969	Monsanto Technology Llc	15	hybrid
US-8134056-B2	Plants and seeds of hybrid corn variety CH409218	Monsanto Technology Llc	10	hybrid
US-8692059-B2	Plants and seeds of hybrid corn variety CH409624	Monsanto Technology Llc	12	hybrid
US-8426707-B2	Plants and seeds of hybrid corn variety CH411439	Monsanto Technology Llc	10	hybrid
US-9167770-B2	Plants and seeds of hybrid corn variety CH413124	Monsanto Technology Llc	13	hybrid
US-2010269203-A1	Plants and seeds of hybrid corn variety ch414517	Monsanto Technology Llc	9	hybrid
US-2010275295-A1	Plants and seeds of hybrid corn variety ch417193	Monsanto Technology Llc	9	hybrid
US-9210892-B2	Plants and seeds of hybrid corn variety CH417272	Monsanto Technology Llc	14	hybrid
US-2010275318-A1	Plants and seeds of hybrid corn variety ch417706	Monsanto Technology Llc	9	hybrid
US-8847035-B2	Plants and seeds of hybrid corn variety CH418043	Monsanto Technology Llc	11	hybrid
US-2017094922-A1	Plants and seeds of hybrid corn variety ch419073	Monsanto Technology Llc	15	hybrid
US-2011277165-A1	Plants and seeds of hybrid corn variety ch419384	Jon Popi	10	hybrid
US-2012278924-A1	Plants and seeds of hybrid corn variety ch421421	Stelpflug Richard G	11	hybrid
US-2009288208-A1	Plants and seeds of hybrid corn variety ch421690	Monsanto Technology Llc	8	hybrid
US-8212130-B2	Plants and seeds of hybrid corn variety CH422303	Monsanto Technology Llc	10	hybrid
US-8710329-B2	Plants and seeds of hybrid corn variety CH424126	Monsanto Technology Llc	12	hybrid
US-7915497-B2	Plants and seeds of hybrid corn variety CH425473	Monsanto Technology Llc	8	hybrid
US-2017094925-A1	Plants and seeds of hybrid corn variety ch426084	Monsanto Technology Llc	15	hybrid
US-8969686-B2	Plants and seeds of hybrid corn variety CH426624	Monsanto Technology Llc	13	hybrid
US-7501565-B2	Plants and seeds of hybrid corn variety CH428066	Monsanto Technology Llc	7	hybrid
US-7227062-B1	Plants and seeds of hybrid corn variety CH431778	Monsanto Technology Llc	5	hybrid
US-8183444-B2	Plants and seeds of hybrid corn variety CH434101	Monsanto Technology Llc	10	hybrid
US-7495157-B2	Plants and seeds of hybrid corn variety CH434931	Monsanto Technology Llc	7	hybrid
US-9232746-B2	Plants and seeds of hybrid corn variety CH435846	Monsanto Technology Llc	14	hybrid
US-2012278928-A1	Plants and seeds of hybrid corn variety ch437161	Sandeep Bhatnagar, Brinkman Mark J, Eichelberger Kevin D, Sarah Gehlhar, Holland Gregory J, Lee Roderick D, Lubich Daniel J, Peters Laron L, Potrzeba Duane A, Hector Ramirez De Leon	11	hybrid
US-9301481-B2	Plants and seeds of hybrid corn variety CH437225	Monsanto Technology Llc	14	hybrid
US-2017094923-A1	Plants and seeds of hybrid corn variety ch438068	Monsanto Technology Llc	15	hybrid
US-8822790-B2	Plants and seeds of hybrid corn variety CH440264	Monsanto Technology Llc	12	hybrid
US-7629519-B2	Plants and seeds of hybrid corn variety CH440394	Monsanto Technology Llc	7	hybrid
US-2009288212-A1	Plants and seeds of hybrid corn variety ch440457	Monsanto Technology Llc	8	hybrid
US-7205465-B1	Plants and seeds of hybrid corn variety CH442935	Monsanto Technology, L.L.C.	5	hybrid
US-2012272371-A1	Plants and seeds of hybrid corn variety ch443000	Jon Popi	11	hybrid
US-2010275312-A1	Plants and seeds of hybrid corn variety ch444919	Monsanto Technology Llc	9	hybrid
US-9018492-B2	Plants and seeds of hybrid corn variety CH445169	Monsanto Technology Llc	13	hybrid
US-7932445-B2	Plants and seeds of hybrid corn variety CH445545	Monsanto Technology Llc	8	hybrid
US-7915499-B2	Plants and seeds of hybrid corn variety CH447868	Monsanto Technology Llc	8	hybrid
US-9210879-B2	Plants and seeds of hybrid corn variety CH448275	Monsanto Technology Llc	13	hybrid
US-9313975-B2	Plants and seeds of hybrid corn variety CH448920	Monsanto Technology Llc	13	hybrid
US-2017094928-A1	Plants and seeds of hybrid corn variety ch450193	Monsanto Technology Llc	15	hybrid
US-2012266283-A1	Plants and seeds of hybrid corn variety ch450823	Monsanto Technology Llc	11	hybrid
US-8604300-B2	Plants and seeds of hybrid corn variety CH451860	Monsanto Technology Llc	11	hybrid
US-7317155-B1	Plants and seeds of hybrid corn variety CH452962	Monsanto Technology Llc	6	hybrid
US-9445561-B2	Plants and seeds of hybrid corn variety CH455765	Monsanto Technology Llc	13	hybrid
US-7728208-B2	Plants and seeds of hybrid corn variety CH456030	Monsanto Technology Llc	8	hybrid
US-8035010-B2	Plants and seeds of hybrid corn variety CH457975	Monsanto Technology LCC	8	hybrid
US-2010293660-A1	Plants and seeds of hybrid corn variety ch458156	Monsanto Technology Llc	9	hybrid
US-2011277120-A1	Plants and seeds of hybrid corn variety ch460162	Monsanto Technology Llc	10	hybrid
US-7342156-B1	Plants and seeds of hybrid corn variety CH461538	Monsanto Technology Llc	6	hybrid
US-8878025-B2	Plants and seeds of hybrid corn variety CH462271	Monsanto Technology Llc	12	hybrid
US-7723588-B2	Plants and seeds of hybrid corn variety CH464638	Monsanto Technology Llc	8	hybrid
US-7718863-B2	Plants and seeds of hybrid corn variety CH465107	Monsanto Technology Llc	8	hybrid
US-7807901-B2	Plants and seeds of hybrid corn variety CH467836	Monsanto Technology Llc	8	hybrid
US-2013283444-A1	Plants and seeds of hybrid corn variety ch468243	Richard G. Stelpflug	12	hybrid
US-2010293657-A1	Plants and seeds of hybrid corn variety ch468487	Monsanto Technology Llc	9	hybrid
US-2012278917-A1	Plants and seeds of hybrid corn variety ch469284	Bergemann Scott A, Birru Fufa H, Frederickson L John, Peter Guzman, Stelpflug Richard G	11	hybrid
US-2010293640-A1	Plants and seeds of hybrid corn variety ch470355	Monsanto Technology Llc	9	hybrid
US-8633363-B2	Plants and seeds of hybrid corn variety CH471541	Monsanto Technology Llc	12	hybrid
US-2008282401-A1	Plants and seeds of hybrid corn variety ch475361	Monsanto Technology Llc	7	hybrid
US-2010269196-A1	Plants and seeds of hybrid corn variety ch475849	Monsanto Technology Llc	9	hybrid
US-2012266270-A1	Plants and seeds of hybrid corn variety ch475945	Gary Stangland, Lynch Peter J	11	hybrid
US-7256333-B1	Plants and seeds of hybrid corn variety CH479202	Monsanto Technology Llc	6	hybrid
US-9433168-B2	Plants and seeds of hybrid corn variety CH481033	Monsanto Technology Llc	14	hybrid
US-2012272354-A1	Plants and seeds of hybrid corn variety ch481662	Stangland Gary R, Lynch Peter J	11	hybrid
US-8207425-B2	Plants and seeds of hybrid corn variety CH482099	Monsanto Technology Llc	9	hybrid
US-7956252-B2	Plants and seeds of hybrid corn variety CH482178	Monsanto Technology Llc	9	hybrid
US-9072267-B2	Plants and seeds of hybrid corn variety CH489755	Monsanto Technology Llc	13	hybrid
US-7718865-B2	Plants and seeds of hybrid corn variety CH490055	Monsanto Technology Llc	8	hybrid
US-9167793-B1	Plants and seeds of hybrid corn variety CH491297	Monsanto Technology Llc	14	hybrid
US-7714216-B1	Plants and seeds of hybrid corn variety CH491400	Monsanto Technology Llc	9	hybrid
US-2013283409-A1	Plants and seeds of hybrid corn variety ch491983	Jon Popi	12	hybrid
US-7910814-B2	Plants and seeds of hybrid corn variety CH493326	Monsanto Technology Llc	8	hybrid
US-2010293659-A1	Plants and seeds of hybrid corn variety ch499092	Monsanto Technology Llc	9	hybrid
US-2012278923-A1	Plants and seeds of hybrid corn variety ch508732	Page Nathaniel J	11	hybrid
US-8884135-B2	Plants and seeds of hybrid corn variety CH508984	Monsanto Technology Llc	12	hybrid
US-7807900-B2	Plants and seeds of hybrid corn variety CH511197	Monsanto Technology Llc	8	hybrid
US-7256334-B1	Plants and seeds of hybrid corn variety CH511458	Monsanto Technology Llc	6	hybrid
US-7514611-B1	Plants and seeds of hybrid corn variety CH512801	Monsanto Technology Llc	6	hybrid
US-8884129-B2	Plants and seeds of hybrid corn variety CH514236	Monsanto Technology Llc	12	hybrid
US-8710318-B2	Plants and seeds of hybrid corn variety CH514730	Monsanto Technology Llc	11	hybrid
US-2012278919-A1	Plants and seeds of hybrid corn variety ch514800	Lubich Daniel J	11	hybrid
US-7655849-B2	Plants and seeds of hybrid corn variety CH515277	Monsanto Technology Llc	8	hybrid
US-2015305266-A1	Plants and seeds of hybrid corn variety ch517525	Monsanto Technology Llc	14	hybrid
US-2012266273-A1	Plants and seeds of hybrid corn variety ch518293	Brinkman Mark J, Michael Dragonuk, Eichelberger Kevin D, Chris Eichhorn, Sarah Gehlhar, Peter Guzman, Holland Gregory J, Lubich Daniel J, Peters Laron L, Potrzeba Duane A, Hector Ramirez De Leon, Souder Christopher L	11	hybrid
US-9237720-B2	Plants and seeds of hybrid corn variety CH519842	Monsanto Technology Llc	14	hybrid
US-7247777-B1	Plants and seeds of hybrid corn variety CH520994	Monsanto Technology Llc	5	hybrid
US-2010293634-A1	Plants and seeds of hybrid corn variety ch522191	Monsanto Technology Llc	9	hybrid
US-8604317-B2	Plants and seeds of hybrid corn variety CH524410	Monsanto Technology Llc	12	hybrid
US-2010263080-A1	Plants and seeds of hybrid corn variety ch524818	Monsanto Technology Llc	9	hybrid
US-2014359839-A1	Plants and seeds of hybrid corn variety ch525115	Monsanto Technology Llc	13	hybrid
US-7683243-B2	Plants and seeds of hybrid corn variety CH525374	Monsanto Technology Llc	7	hybrid
US-9024156-B2	Plants and seeds of hybrid corn variety CH527361	Monsanto Technology Llc	13	hybrid
US-8288627-B2	Plants and seeds of hybrid corn variety CH532948	Monsanto Technology Llc	9	hybrid
US-8502022-B2	Plants and seeds of hybrid corn variety CH533378	Monsanto Technology Llc	11	hybrid
US-9433171-B2	Plants and seeds of hybrid corn variety CH537945	Monsanto Technology Llc	14	hybrid
US-7638692-B2	Plants and seeds of hybrid corn variety CH538026	Monsanto Technology Llc	7	hybrid
US-8129601-B2	Plants and seeds of hybrid corn variety CH538919	Monsanto Technology Llc	9	hybrid
US-2012278925-A1	Plants and seeds of hybrid corn variety ch540328	Michael Dragonuk, Chris Eichhorn, Peter Guzman, Holland Gregory J, Peters Laron L, Leon Hector Ramirez De, Souder Christopher L	11	hybrid
US-7952007-B2	Plants and seeds of hybrid corn variety CH544603	Monsanto Technology Llc	9	hybrid
US-8692061-B2	Plants and seeds of hybrid corn variety CH548933	Monsanto Technology Llc	12	hybrid
US-8039708-B2	Plants and seeds of hybrid corn variety CH550494	Monsanto Technology LLLC	9	hybrid
US-8729370-B2	Plants and seeds of hybrid corn variety CH558436	Monsanto Technology Llc	12	hybrid
US-9237712-B2	Plants and seeds of hybrid corn variety CH558824	Monsanto Technology Llc	14	hybrid
US-8912412-B2	Plants and seeds of hybrid corn variety CH559337	Monsanto Technology Llc	12	hybrid
US-7358427-B1	Plants and seeds of hybrid corn variety CH560027	Monsanto Technology Llc	6	hybrid
US-7399915-B1	Plants and seeds of hybrid corn variety CH560722	Monsanto Technology Llc	7	hybrid
US-9167789-B1	Plants and seeds of hybrid corn variety CH561670	Monsanto Technology Llc	14	hybrid
US-9125369-B2	Plants and seeds of hybrid corn variety CH563328	Monsanto Technology Llc	13	hybrid
US-8283534-B2	Plants and seeds of hybrid corn variety CH565013	Monsanto Technology Llc	10	hybrid
US-8183442-B2	Plants and seeds of hybrid corn variety CH565093	Monsanto Technology Llc	9	hybrid
US-2008282397-A1	Plants and seeds of hybrid corn variety ch569005	Monsanto Technology Llc	7	hybrid
US-2008282402-A1	Plants and seeds of hybrid corn variety ch569011	Monsanto Technology Llc	7	hybrid
US-8822793-B2	Plants and seeds of hybrid corn variety CH569965	Monsanto Technology Llc	12	hybrid
US-2011277131-A1	Plants and seeds of hybrid corn variety ch570457	Monsanto Technology Llc	10	hybrid
US-2010287649-A1	Plants and seeds of hybrid corn variety ch571775	Monsanto Technology Llc	9	hybrid
US-2011277112-A1	Plants and seeds of hybrid corn variety ch572389	Monsanto Technology Llc	10	hybrid
US-9226471-B2	Plants and seeds of hybrid corn variety CH572578	Monsanto Technology Llc	14	hybrid
US-9313971-B2	Plants and seeds of hybrid corn variety CH573224	Monsanto Technology Llc	13	hybrid
US-7339101-B1	Plants and seeds of hybrid corn variety CH578335	Monsanto Technology Llc	6	hybrid
US-9232725-B2	Plants and seeds of hybrid corn variety CH585789	Monsanto Technology Llc	14	hybrid
US-8344227-B2	Plants and seeds of hybrid corn variety CH590373	Monsanto Technology Llc	10	hybrid
US-2014351987-A1	Plants and seeds of hybrid corn variety ch590799	Monsanto Technology Llc	13	hybrid
US-9313988-B2	Plants and seeds of hybrid corn variety CH591615	Monsanto Technology Llc	14	hybrid
US-2014338034-A1	Plants and seeds of hybrid corn variety ch592073	Monsanto Technology Llc	13	hybrid
US-8309824-B2	Plants and seeds of hybrid corn variety CH594228	Monsanto Technology Llc	10	hybrid
US-8420908-B2	Plants and seeds of hybrid corn variety CH594494	Monsanto Technology Llc	10	hybrid
US-2010293658-A1	Plants and seeds of hybrid corn variety ch595207	Monsanto Technology Llc	9	hybrid
US-7875773-B2	Plants and seeds of hybrid corn variety CH600622	Monsanto Technology Llc	8	hybrid
US-2010275293-A1	Plants and seeds of hybrid corn variety ch600830	Monsanto Technology Llc	9	hybrid
US-8669441-B2	Plants and seeds of hybrid corn variety CH602747	Monsanto Technology Llc	12	hybrid
US-2008282375-A1	Plants and seeds of hybrid corn variety ch602914	Monsanto Technology Llc	7	hybrid
US-2010293652-A1	Plants and seeds of hybrid corn variety ch604406	Monsanto Technology Llc	9	hybrid
US-9210904-B2	Plants and seeds of hybrid corn variety CH606161	Monsanto Technology Llc	14	hybrid
US-7718864-B2	Plants and seeds of hybrid corn variety CH607807	Monsanto Technology Llc	8	hybrid
US-7919695-B2	Plants and seeds of hybrid corn variety CH610543	Monsanto Technology Llc	8	hybrid
US-7655845-B2	Plants and seeds of hybrid corn variety CH611149	Monsanto Technology Llc	7	hybrid
US-7678975-B2	Plants and seeds of hybrid corn variety CH611387	Monsanto Technology Llc	8	hybrid
US-7504567-B1	Plants and seeds of hybrid corn variety CH612245	Monsanto Technology Llc	6	hybrid
US-2013291161-A1	Plants and seeds of hybrid corn variety ch612435	Mark J. Brinkman, Michael Dragonuk, Kevin D. Eichelberger, Chris Eichhorn, Sarah Gehlhar, Gregory J. Holland, Michael A. Josephs, Daniel J. Lubich, Jeffrey L. McElroy, Laron L. Peters, Duane A. Potrzeba, Hector Ramirez de Leon, Christopher L. Souder	12	hybrid
US-7626100-B2	Plants and seeds of hybrid corn variety CH613376	Monsanto Technology Llc	7	hybrid
US-2010269205-A1	Plants and seeds of hybrid corn variety ch614522	Monsanto Technology Llc	9	hybrid
US-2010275297-A1	Plants and seeds of hybrid corn variety ch615908	Monsanto Technology Llc	9	hybrid
US-7262348-B1	Plants and seeds of hybrid corn variety CH616860	Monsanto Technology Llc	5	hybrid
US-7915496-B2	Plants and seeds of hybrid corn variety CH619141	Monsanto Technology Llc	8	hybrid
US-2010275304-A1	Plants and seeds of hybrid corn variety ch621142	Monsanto Technology Llc	9	hybrid
US-7943834-B2	Plants and seeds of hybrid corn variety CH621537	Monsanto Technology Llc	9	hybrid
US-9072266-B2	Plants and seeds of hybrid corn variety CH623554	Monsanto Technology Llc	13	hybrid
US-9125367-B2	Plants and seeds of hybrid corn variety CH624682	Monsanto Technology Llc	13	hybrid
US-2010293632-A1	Plants and seeds of hybrid corn variety ch626058	Monsanto Technology Llc	9	hybrid
US-7947883-B2	Plants and seeds of hybrid corn variety CH626994	Monsanto Technology Llc	9	hybrid
US-2008282421-A1	Plants and seeds of hybrid corn variety ch627005	Monsanto Technology Llc	7	hybrid
US-9237711-B2	Plants and seeds of hybrid corn variety CH627895	Monsanto Technology Llc	14	hybrid
US-9232741-B2	Plants and seeds of hybrid corn variety CH631775	Monsanto Technology Llc	14	hybrid
US-2010293655-A1	Plants and seeds of hybrid corn variety ch635608	Monsanto Technology Llc	9	hybrid
US-7659455-B2	Plants and seeds of hybrid corn variety CH635689	Monsanto Technology Llc	7	hybrid
US-8604316-B2	Plants and seeds of hybrid corn variety CH636616	Monsanto Technology Llc	12	hybrid
US-2013283430-A1	Plants and seeds of hybrid corn variety ch637365	Mark J. Brinkman, Gary R. Stangland, Peter J. Lynch	12	hybrid
US-2011283404-A1	Plants and seeds of hybrid corn variety ch637374	Hellewell Kendell B	10	hybrid
US-9072257-B2	Plants and seeds of hybrid corn variety CH639228	Monsanto Technology Llc	13	hybrid
US-2010293650-A1	Plants and seeds of hybrid corn variety ch639732	Monsanto Technology Llc	9	hybrid
US-2010275314-A1	Plants and seeds of hybrid corn variety ch639930	Monsanto Technology Llc	9	hybrid
US-8178762-B2	Plants and seeds of hybrid corn variety CH640520	Monsanto Technology Llc	10	hybrid
US-7470836-B1	Plants and seeds of hybrid corn variety CH645346	Monsanto Technology Llc	6	hybrid
US-8697946-B2	Plants and seeds of hybrid corn variety CH649707	Monsanto Technology Llc	12	hybrid
US-2010269202-A1	Plants and seeds of hybrid corn variety ch651588	Monsanto Technology Llc	9	hybrid
US-7655847-B2	Plants and seeds of hybrid corn variety CH652087	Monsanto Technology Llc	8	hybrid
US-7968775-B2	Plants and seeds of hybrid corn variety CH652359	Monsanto Technology Llc	9	hybrid
US-9232733-B2	Plants and seeds of hybrid corn variety CH653970	Monsanto Technology Llc	14	hybrid
US-7417183-B1	Plants and seeds of hybrid corn variety CH654387	Monsanto Technology Llc	7	hybrid
US-9301483-B2	Plants and seeds of hybrid corn variety CH656805	Monsanto Technology Llc	14	hybrid
US-9167772-B2	Plants and seeds of hybrid corn variety CH657855	Monsanto Technology Llc	13	hybrid
US-8735688-B2	Plants and seeds of hybrid corn variety CH658401	Monsanto Technology Llc	11	hybrid
US-9433169-B2	Plants and seeds of hybrid corn variety CH658574	Monsanto Technology Llc	14	hybrid
US-2012266304-A1	Plants and seeds of hybrid corn variety ch661125	Scott Bergemann, Birru Fufa H, Frederickson L John, Peter Guzman, Stelpflug Richard G	11	hybrid
US-8692060-B2	Plants and seeds of hybrid corn variety CH663663	Monsanto Technology Llc	12	hybrid
US-2010293649-A1	Plants and seeds of hybrid corn variety ch663941	Monsanto Technology Llc	9	hybrid
US-9232734-B2	Plants and seeds of hybrid corn variety CH664189	Monsanto Technology Llc	14	hybrid
US-9072243-B2	Plants and seeds of hybrid corn variety CH666631	Monsanto Technology Llc	13	hybrid
US-2011277164-A1	Plants and seeds of hybrid corn variety ch667265	Stelpflug Richard G, Faue Allen C	10	hybrid
US-9232728-B2	Plants and seeds of hybrid corn variety CH669468	Monsanto Technology Llc	14	hybrid
US-8183443-B2	Plants and seeds of hybrid corn variety CH669818	Monsanto Technology Llc	10	hybrid
US-8324475-B2	Plants and seeds of hybrid corn variety CH671922	Monsanto Technology Llc	10	hybrid
US-7504569-B2	Plants and seeds of hybrid corn variety CH672515	Monsanto Technology Llc	7	hybrid
US-8618381-B2	Plants and seeds of hybrid corn variety CH673389	Monsanto Technology Llc	12	hybrid
US-8969684-B2	Plants and seeds of hybrid corn variety CH673944	Monsanto Technology Llc	13	hybrid
US-7605315-B1	Plants and seeds of hybrid corn variety CH675395	Monsanto Technology Llc	8	hybrid
US-2010287652-A1	Plants and seeds of hybrid corn variety ch676009	Monsanto Technology Llc	9	hybrid
US-2008282389-A1	Plants and seeds of hybrid corn variety ch676532	Monsanto Technology Llc	7	hybrid
US-7952005-B2	Plants and seeds of hybrid corn variety CH677070	Monsanto Technology Llc	9	hybrid
US-2008282417-A1	Plants and seeds of hybrid corn variety ch677559	Monsanto Technology Llc	7	hybrid
US-8884130-B2	Plants and seeds of hybrid corn variety CH679037	Monsanto Technology Llc	12	hybrid
US-7601899-B1	Plants and seeds of hybrid corn variety CH680747	Monsanto Technology Llc	6	hybrid
US-8344216-B2	Plants and seeds of hybrid corn variety CH681203	Monsanto Technology Llc	10	hybrid
US-2010275315-A1	Plants and seeds of hybrid corn variety ch682569	Monsanto Technology Llc	9	hybrid
US-8314310-B2	Plants and seeds of hybrid corn variety CH683282	Monsanto Technology Llc	10	hybrid
US-2014344990-A1	Plants and seeds of hybrid corn variety ch684331	Monsanto Technology Llc	13	hybrid
US-7737347-B2	Plants and seeds of hybrid corn variety CH684476	Monsanto Technology Llc	8	hybrid
US-9210901-B2	Plants and seeds of hybrid corn variety CH687004	Monsanto Technology Llc	14	hybrid
US-2012284849-A1	Plants and seeds of hybrid corn variety ch690072	Brinkman Mark J, Eichelberger Kevin D, Foresman Charles T, Holland Gregory J, Lee Roderick D, Lubich Daniel J, Peters Laron L, Peterson W Richard, Potrzeba Duane A, Hector Ramirez De Leon	11	hybrid
US-8319054-B2	Plants and seeds of hybrid corn variety CH692234	Monsanto Technology Llc	10	hybrid
US-9210888-B2	Plants and seeds of hybrid corn variety CH692448	Monsanto Technology Llc	14	hybrid
US-9265213-B2	Plants and seeds of hybrid corn variety CH693571	Monsanto Technology Llc	14	hybrid
US-8367914-B2	Plants and seeds of hybrid corn variety CH694532	Monsanto Technology Llc	10	hybrid
US-7718867-B2	Plants and seeds of hybrid corn variety CH698617	Monsanto Technology Llc	8	hybrid
US-9232745-B2	Plants and seeds of hybrid corn variety CH699918	Monsanto Technology Llc	14	hybrid
US-8134055-B2	Plants and seeds of hybrid corn variety CH700775	Monsanto Technology Llc	9	hybrid
US-2012272360-A1	Plants and seeds of hybrid corn variety ch707173	Eichelberger Kevin D	11	hybrid
US-2013283421-A1	Plants and seeds of hybrid corn variety ch710330	Gary R. Stangland, Peter J. Lynch	12	hybrid
US-2012284846-A1	Plants and seeds of hybrid corn variety ch711103	Stangland Gary R, Lynch Peter J	11	hybrid
US-2010293651-A1	Plants and seeds of hybrid corn variety ch713848	Monsanto Technology Llc.	9	hybrid
US-7227061-B1	Plants and seeds of hybrid corn variety CH715383	Monsanto Technology Llc	5	hybrid
US-2012284832-A1	Plants and seeds of hybrid corn variety ch715413	Faue Allen C, Mateo Rafael A, Stelpflug Richard G	11	hybrid
US-8884134-B2	Plants and seeds of hybrid corn variety CH715748	Monsanto Technology Llc	12	hybrid
US-8035008-B2	Plants and seeds of hybrid corn variety CH716590	Monsanto Technology Llc	8	hybrid
US-8710315-B2	Plants and seeds of hybrid corn variety CH717591	Monsanto Technology Llc	11	hybrid
US-7329803-B1	Plants and seeds of hybrid corn variety CH718391	Monsanto Technology Llc	5	hybrid
US-7678968-B2	Plants and seeds of hybrid corn variety CH719138	Monsanto Technology Llc	7	hybrid
US-2012266274-A1	Plants and seeds of hybrid corn variety ch719460	Sandeep Bhatnagar, Brinkman Mark J, Eichelberger Kevin D, Sarah Gehlhar, Holland Gregory J, Lee Roderick D, Lubich Daniel J, Peters Laron L, Potrzeba Duane A, Hector Ramirez De Leon	11	hybrid
US-7807899-B2	Plants and seeds of hybrid corn variety CH720554	Monsanto Technology Llc	8	hybrid
US-2012284839-A1	Plants and seeds of hybrid corn variety ch722527	Slobodan Trifunovic	11	hybrid
US-8203057-B2	Plants and seeds of hybrid corn variety CH727695	Monsanto Technology Llc	10	hybrid
US-8835728-B2	Plants and seeds of hybrid corn variety CH727917	Monsanto Technology Llc	12	hybrid
US-8344226-B2	Plants and seeds of hybrid corn variety CH728664	Monsanto Technology Llc	10	hybrid
US-2013283440-A1	Plants and seeds of hybrid corn variety ch732605	Richard G. Stelpflug	12	hybrid
US-8319065-B2	Plants and seeds of hybrid corn variety CH734952	Monsanto Technology Llc	10	hybrid
US-8609964-B2	Plants and seeds of hybrid corn variety CH738196	Monsanto Technology Llc	12	hybrid
US-9029664-B2	Plants and seeds of hybrid corn variety CH740515	Monsanto Technology Llc	13	hybrid
US-8940978-B2	Plants and seeds of hybrid corn variety CH741796	Monsanto Technology Llc	12	hybrid
US-7807904-B2	Plants and seeds of hybrid corn variety CH744092	Monsanto Technology Llc	8	hybrid
US-9167771-B2	Plants and seeds of hybrid corn variety CH745184	Monsanto Technology Llc	13	hybrid
US-8203055-B2	Plants and seeds of hybrid corn variety CH745929	Monsanto Technology Llc	10	hybrid
US-2010293638-A1	Plants and seeds of hybrid corn variety ch746304	Monsanto Technology Llc	9	hybrid
US-9301477-B2	Plants and seeds of hybrid corn variety CH746391	Monsanto Technology Llc	14	hybrid
US-7910812-B2	Plants and seeds of hybrid corn variety CH746441	Monsanto Technology Llc	8	hybrid
US-2012266291-A1	Plants and seeds of hybrid corn variety ch747326	Brinkman Mark J, Michael Dragonuk, Eichelberger Kevin D, Chris Eichhorn, Sarah Gehlhar, Peter Guzman, Holland Gregory J, Lubich Daniel J, Peters Laron L, Potrzeba Duane A, Leon Hector Ramirez De, Souder Christopher L	11	hybrid
US-8124855-B2	Plants and seeds of hybrid corn variety CH747345	Monsanto Technology Llc	8	hybrid
US-7671256-B2	Plants and seeds of hybrid corn variety CH748450	Monsanto Technology Llc	7	hybrid
US-8618372-B2	Plants and seeds of hybrid corn variety CH748474	Monsanto Technology Llc	10	hybrid
US-8203056-B2	Plants and seeds of hybrid corn variety CH752576	Monsanto Technology Llc	10	hybrid
US-8889972-B1	Plants and seeds of hybrid corn variety CH752946	Monsanto Technology Llc	13	hybrid
US-7521614-B2	Plants and seeds of hybrid corn variety CH756602	Monsanto Technology Llc	7	hybrid
US-8674199-B2	Plants and seeds of hybrid corn variety CH757483	Monsanto Technology Llc	12	hybrid
US-7714212-B2	Plants and seeds of hybrid corn variety CH759587	Monsanto Technology Llc	8	hybrid
US-8853508-B2	Plants and seeds of hybrid corn variety CH760284	Monsanto Technology Llc	12	hybrid
US-8207427-B2	Plants and seeds of hybrid corn variety CH762507	Monsanto Technology Llc	10	hybrid
US-9232727-B2	Plants and seeds of hybrid corn variety CH763223	Monsanto Technology Llc	14	hybrid
US-8853509-B2	Plants and seeds of hybrid corn variety CH765192	Monsanto Technology Llc	12	hybrid
US-2010275298-A1	Plants and seeds of hybrid corn variety ch767068	Monsanto Technology Llc	9	hybrid
US-2014338035-A1	Plants and seeds of hybrid corn variety ch768004	Monsanto Technology Llc	13	hybrid
US-7718870-B1	Plants and seeds of hybrid corn variety CH771816	Monsanto Technology Llc	9	hybrid
US-8035012-B2	Plants and seeds of hybrid corn variety CH776843	Peters Laron L	9	hybrid
US-7230173-B1	Plants and seeds of hybrid corn variety CH779362	Monsanto Technology Llc	5	hybrid
US-7563966-B1	Plants and seeds of hybrid corn variety CH779391	Monsanto Technology Llc	8	hybrid
US-2010287650-A1	Plants and seeds of hybrid corn variety ch779573	Monsanto Technology Llc	9	hybrid
US-2012266296-A1	Plants and seeds of hybrid corn variety ch780680	Slobodan Trifunovic, Trevisan Walter L	11	hybrid
US-7816587-B2	Plants and seeds of hybrid corn variety CH780761	Monsanto Technology Llc	8	hybrid
US-2012272365-A1	Plants and seeds of hybrid corn variety ch784195	Brinkman Mark J, Potrzeba Duane A, Peters Laron L	11	hybrid
US-7592527-B1	Plants and seeds of hybrid corn variety CH786854	Monsanto Technology Llc	8	hybrid
US-2013283445-A1	Plants and seeds of hybrid corn variety ch786873	Michael Dragonuk, Chris Eichhorn, Peter Guzman, Gregory J. Holland, Michael A. Josephs, Jeffrey L. McElroy, Laron L. Peters, Hector Ramirez De Leon, Christopher L. Souder	12	hybrid
US-7608762-B2	Plants and seeds of hybrid corn variety CH788706	Monsanto Technology Llc	7	hybrid
US-7723587-B2	Plants and seeds of hybrid corn variety CH790896	Monsanto Technology Llc	8	hybrid
US-2008282384-A1	Plants and seeds of hybrid corn variety ch790925	Monsanto Technology Llc	7	hybrid
US-2012278922-A1	Plants and seeds of hybrid corn variety ch793010	Bergemann Scott A, Birru Fufa H, Frederickson L John, Peter Guzman, Stelpflug Richard G	11	hybrid
US-8319067-B2	Plants and seeds of hybrid corn variety CH793575	Monsanto Technology Llc	10	hybrid
US-7960624-B2	Plants and seeds of hybrid corn variety CH794019	Monsanto Technology Llc	9	hybrid
US-9018493-B2	Plants and seeds of hybrid corn variety CH796937	Monsanto Technology Llc	13	hybrid
US-2012278921-A1	Plants and seeds of hybrid corn variety ch799431	Bergemann Scott A, Birru Fufa H, Frederickson L John, Peter Guzman, Stelpflug Richard G	11	hybrid
US-2009282558-A1	Plants and seeds of hybrid corn variety ch800297	Monsanto Technology Llc	8	hybrid
US-7547824-B1	Plants and seeds of hybrid corn variety CH801605	Monsanto Technology Llc	6	hybrid
US-8530729-B2	Plants and seeds of hybrid corn variety CH804791	Monsanto Technology Llc	11	hybrid
US-7723586-B2	Plants and seeds of hybrid corn variety CH806109	Monsanto Technology Llc	8	hybrid
US-8937230-B2	Plants and seeds of hybrid corn variety CH806961	Monsanto Technology Llc	12	hybrid
US-2008282385-A1	Plants and seeds of hybrid corn variety ch808812	Monsanto Technology Llc	7	hybrid
US-8319069-B2	Plants and seeds of hybrid corn variety CH809540	Monsanto Technology Llc	10	hybrid
US-9232736-B2	Plants and seeds of hybrid corn variety CH810147	Monsanto Technology Llc	14	hybrid
US-7678976-B2	Plants and seeds of hybrid corn variety CH811261	Monsanto Technology Llc	8	hybrid
US-7915495-B2	Plants and seeds of hybrid corn variety CH811484	Monsanto Technology Llc	8	hybrid
US-2011283412-A1	Plants and seeds of hybrid corn variety ch812985	Stelpflug Richard G, Frederickson L John	10	hybrid
US-9072260-B2	Plants and seeds of hybrid corn variety CH813265	Monsanto Technology Llc	13	hybrid
US-8330025-B2	Plants and seeds of hybrid corn variety CH816791	Monsanto Technology Llc	11	hybrid
US-8710316-B2	Plants and seeds of hybrid corn variety CH817100	Monsanto Technology Llc	11	hybrid
US-9018494-B2	Plants and seeds of hybrid corn variety CH819755	Monsanto Technology Llc	13	hybrid
US-7605316-B1	Plants and seeds of hybrid corn variety CH820648	Monsanto Technology Llc	8	hybrid
US-8288629-B2	Plants and seeds of hybrid corn variety CH822080	Monsanto Technology Llc	10	hybrid
US-2012272372-A1	Plants and seeds of hybrid corn variety ch822360	Birru Fufa H, Faue Allen C, Stelpflug Richard G	11	hybrid
US-9210897-B2	Plants and seeds of hybrid corn variety CH823049	Monsanto Technology Llc	14	hybrid
US-7468477-B2	Plants and seeds of hybrid corn variety CH824610	Monsanto Technology Llc	7	hybrid
US-2009288201-A1	Plants and seeds of hybrid corn variety ch825595	Monsanto Technology Llc	8	hybrid
US-2012272355-A1	Plants and seeds of hybrid corn variety ch825920	Bergemann Scott A, Birru Fufa H, Frederickson L John, Peter Guzman, Stelpfug Richard G	11	hybrid
US-9232748-B2	Plants and seeds of hybrid corn variety CH827983	Monsanto Technology Llc	14	hybrid
US-7906713-B2	Plants and seeds of hybrid corn variety CH830291	Monsanto Technology Llc	8	hybrid
US-9018443-B2	Plants and seeds of hybrid corn variety CH832402	Monsanto Technology Llc	13	hybrid
US-2010293653-A1	Plants and seeds of hybrid corn variety ch832456	Monsanto Technology Llc	9	hybrid
US-9029663-B2	Plants and seeds of hybrid corn variety CH832984	Monsanto Technology Llc	13	hybrid
US-9232740-B2	Plants and seeds of hybrid corn variety CH840240	Monsanto Technology Llc	14	hybrid
US-7288704-B1	Plants and seeds of hybrid corn variety CH840481	Monsanto Technology Llc	6	hybrid
US-2012272366-A1	Plants and seeds of hybrid corn variety ch841046	Belgin Cukadar	11	hybrid
US-2010293642-A1	Plants and seeds of hybrid corn variety ch842817	Monsanto Technology Llc	9	hybrid
US-2012284843-A1	Plants and seeds of hybrid corn variety ch843541	Brinkman Mark J, Michael Dragonuk, Eichelberger Kevin D, Chris Eichhorn, Sarah Gehlhar, Peter Guzman, Holland Gregory J, Lubich Daniel J, Peters Laron L, Potrzeba Duane A, Hector Ramirez De Leon, Sounder Christopher L	11	hybrid
US-9237715-B2	Plants and seeds of hybrid corn variety CH844202	Monsanto Technology Llc	14	hybrid
US-2010293645-A1	Plants and seeds of hybrid corn variety ch845645	Monsanto Technology Llc	9	hybrid
US-2010293661-A1	Plants and seeds of hybrid corn variety ch846537	Monsanto Technology Llc	9	hybrid
US-2011277113-A1	Plants and seeds of hybrid corn variety ch847610	Monsanto Technology Llc	10	hybrid
US-8138400-B2	Plants and seeds of hybrid corn variety CH848055	Monsanto Technology Llc	10	hybrid
US-2014338023-A1	Plants and seeds of hybrid corn variety ch848600	Monsanto Technology Llc	13	hybrid
US-8847045-B2	Plants and seeds of hybrid corn variety CH850252	Monsanto Technology Llc	12	hybrid
US-8330016-B2	Plants and seeds of hybrid corn variety CH851373	Monsanto Technology Llc	10	hybrid
US-8373045-B2	Plants and seeds of hybrid corn variety CH851446	Monsanto Technology Llc	10	hybrid
US-2009282545-A1	Plants and seeds of hybrid corn variety ch852179	Monsanto Technology Llc	8	hybrid
US-8937232-B2	Plants and seeds of hybrid corn variety CH858223	Monsanto Technology Llc	12	hybrid
US-2013291174-A1	Plants and seeds of hybrid corn variety ch859703	Slobodan Trifunovic	12	hybrid
US-8329985-B2	Plants and seeds of hybrid corn variety CH861515	Monsanto Technology Llc	10	hybrid
US-7659462-B2	Plants and seeds of hybrid corn variety CH862061	Monsanto Technology Llc	8	hybrid
US-9072256-B2	Plants and seeds of hybrid corn variety CH863777	Monsanto Technology Llc	13	hybrid
US-2011277166-A1	Plants and seeds of hybrid corn variety ch864601	John Frederickson	10	hybrid
US-9237709-B2	Plants and seeds of hybrid corn variety CH865322	Monsanto Technology Llc	14	hybrid
US-8076553-B2	Plants and seeds of hybrid corn variety CH866785	Monsanto Technology Llc	9	hybrid
US-2012272374-A1	Plants and seeds of hybrid corn variety ch868887	Bergemann Scott A, Fufa H Birru, Chris Eichhorn, Frederickson L John, Peter Guzman, Souder Christopher L, Stelpflug Richard G	11	hybrid
US-9237710-B2	Plants and seeds of hybrid corn variety CH870386	Monsanto Technology Llc	14	hybrid
US-2012266287-A1	Plants and seeds of hybrid corn variety ch871604	Stangland Gary R, Lynch Peter J	11	hybrid
US-7193146-B1	Plants and seeds of hybrid corn variety CH877148	Monsanto Technology, L.L.C.	5	hybrid
US-7550655-B2	Plants and seeds of hybrid corn variety CH880993	Monsanto Technology Llc	7	hybrid
US-7737346-B2	Plants and seeds of hybrid corn variety CH887239	Monsanto Technology Llc	8	hybrid
US-2011277175-A1	Plants and seeds of hybrid corn variety ch889077	Monsanto Technology Llc	10	hybrid
US-8884139-B1	Plants and seeds of hybrid corn variety CH889624	Monsanto Technology Llc	13	hybrid
US-8912411-B2	Plants and seeds of hybrid corn variety CH889629	Monsanto Technology Llc	12	hybrid
US-7592521-B2	Plants and seeds of hybrid corn variety CH890240	Monsanto Technology Llc	7	hybrid
US-9220232-B2	Plants and seeds of hybrid corn variety CH890298	Monsanto Technology Llc	14	hybrid
US-8618383-B2	Plants and seeds of hybrid corn variety CH892315	Monsanto Technology Llc	12	hybrid
US-2009288192-A1	Plants and seeds of hybrid corn variety ch892646	Page Nathaniel J	8	hybrid
US-2010293636-A1	Plants and seeds of hybrid corn variety ch895525	Stelpflug Richard G	9	hybrid
US-2009288191-A1	Plants and seeds of hybrid corn variety ch897363	Monsanto Technology Llc	8	hybrid
US-9024158-B2	Plants and seeds of hybrid corn variety CH900059	Monsanto Technology Llc	13	hybrid
US-8692058-B2	Plants and seeds of hybrid corn variety CH900774	Monsanto Technology Llc	12	hybrid
US-9018496-B2	Plants and seeds of hybrid corn variety CH902675	Monsanto Technology Llc	13	hybrid
US-2009288200-A1	Plants and seeds of hybrid corn variety ch904217	Monsanto Technology Llc	8	hybrid
US-9237694-B2	Plants and seeds of hybrid corn variety CH909736	Monsanto Technology Llc	13	hybrid
US-7534943-B1	Plants and seeds of hybrid corn variety CH910249	Monsanto Technology Llc	8	hybrid
US-2009282571-A1	Plants and seeds of hybrid corn variety ch911371	Monsanto Technology Llc	8	hybrid
US-7217874-B1	Plants and seeds of hybrid corn variety CH916386	Monsanto Technology, L.L.C.	5	hybrid
US-7910813-B2	Plants and seeds of hybrid corn variety CH918158	Monsanto Technology Llc	8	hybrid
US-8319057-B2	Plants and seeds of hybrid corn variety CH918331	Monsanto Technology Llc	10	hybrid
US-8324477-B2	Plants and seeds of hybrid corn variety CH918848	Monsanto Technology Llc	10	hybrid
US-2008282415-A1	Plants and seeds of hybrid corn variety ch919277	Monsanto Technology Llc	7	hybrid
US-9210878-B2	Plants and seeds of hybrid corn variety CH921588	Monsanto Technology Llc	13	hybrid
US-7629518-B2	Plants and seeds of hybrid corn variety CH923156	Monsanto Technology Llc	7	hybrid
US-8816174-B2	Plants and seeds of hybrid corn variety CH923684	Monsanto Technology Llc	12	hybrid
US-7872178-B2	Plants and seeds of hybrid corn variety CH929154	Monsanto Technology Llc	8	hybrid
US-2010275300-A1	Plants and seeds of hybrid corn variety ch929723	Monsanto Technology Llc	9	hybrid
US-2010275290-A1	Plants and seeds of hybrid corn variety ch931748	Monsanto Technology Llc	9	hybrid
US-7714211-B2	Plants and seeds of hybrid corn variety CH933105	Monsanto Technology Llc	8	hybrid
US-8618382-B2	Plants and seeds of hybrid corn variety CH934079	Monsanto Technology Llc	12	hybrid
US-7667113-B2	Plants and seeds of hybrid corn variety CH934397	Monsanto Technology Llc	8	hybrid
US-2012266298-A1	Plants and seeds of hybrid corn variety ch934907	Sandeep Bhatnagar, Brinkman Mark J, Eichelberger Kevin D, Sarah Gehlhar, Holland Gregory J, Lee Roderick D, Lubich Daniel J, Peters Laron L, Potrzeba Duane A, Hector Ramirez De Leon	11	hybrid
US-8314312-B2	Plants and seeds of hybrid corn variety CH938231	Monsanto Technology Llc	11	hybrid
US-7960625-B2	Plants and seeds of hybrid corn variety CH938558	Monsanto Technology Llc	9	hybrid
US-7737343-B2	Plants and seeds of hybrid corn variety CH939349	Monsanto Technology Llc	7	hybrid
US-2012284851-A1	Plants and seeds of hybrid corn variety ch939369	Sandeep Bhatnagar, Lee Roderick D, Lubich Daniel J, Stangland Gary R	11	hybrid
US-2010293637-A1	Plants and seeds of hybrid corn variety ch941858	Monsanto Technology Llc	9	hybrid
US-9215855-B2	Plants and seeds of hybrid corn variety CH942450	Monsanto Technology Llc	14	hybrid
US-7638694-B2	Plants and seeds of hybrid corn variety CH944969	Monsanto Technology Llc	8	hybrid
US-8722994-B2	Plants and seeds of hybrid corn variety CH945438	Monsanto Technology Llc	11	hybrid
US-7663036-B2	Plants and seeds of hybrid corn variety CH945822	Monsanto Technology Llc	8	hybrid
US-7615692-B2	Plants and seeds of hybrid corn variety CH946240	Monsanto Technology Llc	7	hybrid
US-8207428-B2	Plants and seeds of hybrid corn variety CH946559	Monsanto Technology Llc	10	hybrid
US-7737344-B2	Plants and seeds of hybrid corn variety CH947918	Monsanto Technology Llc	8	hybrid
US-2012266295-A1	Plants and seeds of hybrid corn variety ch948307	Sandeep Bhatnagar, Brinkman Mark J, Eichelberger Kevin D, Sarah Gehlhar, Holland Gregory J, Lee Roderick D, Lubich Daniel J, Peters Laron L, Potrzeba Duane A, Ramirez De Leon Hector	11	hybrid
US-9210895-B2	Plants and seeds of hybrid corn variety CH948868	Monsanto Technology Llc	14	hybrid
US-9320230-B2	Plants and seeds of hybrid corn variety CH950669	Monsanto Technology Llc	14	hybrid
US-7872182-B2	Plants and seeds of hybrid corn variety CH951965	Monsanto Technology Llc	8	hybrid
US-8618384-B2	Plants and seeds of hybrid corn variety CH952833	Monsanto Technology Llc	12	hybrid
US-7678970-B2	Plants and seeds of hybrid corn variety CH954175	Monsanto Technology Llc	7	hybrid
US-7872184-B2	Plants and seeds of hybrid corn variety CH955795	Monsanto Technology Llc	9	hybrid
US-7250564-B1	Plants and seeds of hybrid corn variety CH956311	Monsanto Technology Llc	5	hybrid
US-8415542-B2	Plants and seeds of hybrid corn variety CH956667	Monsanto Technology Llc	10	hybrid
US-8183445-B2	Plants and seeds of hybrid corn variety CH957322	Monsanto Technology Llc	10	hybrid
US-2011107452-A1	Plants and seeds of hybrid corn variety ch958300	Stelpflug Richard G, Faue Allen C, Gustavo Gonzalez Roelants	9	hybrid
US-7659458-B2	Plants and seeds of hybrid corn variety CH958922	Monsanto Technology Llc	8	hybrid
US-7939730-B2	Plants and seeds of hybrid corn variety CH960405	Monsanto Technology Llc	8	hybrid
US-2009282552-A1	Plants and seeds of hybrid corn variety ch961186	Monsanto Technology Llc	8	hybrid
US-2012266300-A1	Plants and seeds of hybrid corn variety ch964539	Boerboom Marvin L	11	hybrid
US-9320225-B2	Plants and seeds of hybrid corn variety CH966110	Monsanto Technology Llc	14	hybrid
US-2012278918-A1	Plants and seeds of hybrid corn variety ch967642	Bergemann Scott A, Birru Fufa H, Frederickson L John, Peter Guzman, Stelpflug Richard G	11	hybrid
US-8129602-B2	Plants and seeds of hybrid corn variety CH970892	Monsanto Technology Llc	10	hybrid
US-8669416-B2	Plants and seeds of hybrid corn variety CH971018	Monsanto Technology Llc	12	hybrid
US-9072252-B2	Plants and seeds of hybrid corn variety CH971321	Monsanto Technology Llc	13	hybrid
US-2011277122-A1	Plants and seeds of hybrid corn variety ch972645	Monsanto Technology Llc	10	hybrid
US-7453031-B1	Plants and seeds of hybrid corn variety CH974077	Monsanto Technology Llc	7	hybrid
US-9167776-B2	Plants and seeds of hybrid corn variety CH981713	Monsanto Technology Llc	13	hybrid
US-2012284844-A1	Plants and seeds of hybrid corn variety ch984051	Stangland Gary R, Lynch Peter J	11	hybrid
US-2012284837-A1	Plants and seeds of hybrid corn variety ch985672	Bergemann Scott A, Birru Fufa H, Chris Eichhorn, Frederickson L John, Peter Guzman, Souder Christopher L, Stelpflug Richard G	11	hybrid
US-2010275306-A1	Plants and seeds of hybrid corn variety ch986372	Holland Gregory J, Larkins James R	9	hybrid
US-2010293629-A1	Plants and seeds of hybrid corn variety ch987090	Monsanto Technology Llc	9	hybrid
US-9237728-B2	Plants and seeds of hybrid corn variety CH989672	Monsanto Technology Llc	14	hybrid
US-8119882-B2	Plants and seeds of hybrid corn variety CH990185	Monsanto Technology Llc	8	hybrid
US-9210902-B2	Plants and seeds of hybrid corn variety CH991116	Monsanto Technology Llc	14	hybrid
US-2012284825-A1	Plants and seeds of hybrid corn variety ch994532	Slobodan Trifunovic	11	hybrid
US-2012284831-A1	Plants and seeds of hybrid corn variety ch995927	Faue Allen C, Mateo Rafael A, Stelpflug Richard G	11	hybrid
US-8115080-B2	Plants and seeds of hybrid corn variety CH997005	Monsanto Technology Llc	9	hybrid
US-2011277124-A1	Plants and seeds of hybrid corn variety ch997743	Monsanto Technology Llc	9	hybrid
US-9265216-B2	Plants and seeds of hybrid corn variety CH998883	Monsanto Technology Llc	14	hybrid
US-8383902-B2	Plants and seeds of hybrid corn variety CH999541	Monsanto Technology Llc	10	hybrid
US-5574208-A	Hybrid corn plant (3893)	Pioneer Hi-Bred International Inc.	94	hybrid
US-5557035-A	Hybrid corn plant & seed (3489)	Pioneer Hi-Bred International Inc.	94	hybrid
US-4731499-A	Hybrid corn plant and seed	Pioneer Hi-Bred International Inc.	87	hybrid
US-4737596-A	Hybrid corn plant and seed	Pioneer Hi-Bred International Inc.	87	hybrid
US-5491295-A	Hybrid corn plant and seed	Pioneer Hi-Bred International Inc.	91	hybrid
US-5530180-A	Hybrid corn plant and seed (3189)	Pioneer Hi-Bred International Inc.	89	hybrid
US-5491290-A	Hybrid corn plant and seed (3525)	Pioneer Hi-Bred International Inc.	92	hybrid
US-5495066-A	Hybrid corn plant and seed (3531)	Pioneer Hi-Bred International Inc.	94	hybrid
US-5502272-A	Hybrid corn plant and seed (3563)	Pioneer Hi-Bred International Inc.	91	hybrid
US-5491287-A	Hybrid corn plant and seed (3905)	Pioneer Hi-Bred International Inc.	94	hybrid
US-6987217-B2	Hybrid maize 32B10	Pioneer Hi-Bred International Inc.	4	hybrid
US-6936756-B2	Hybrid maize 32K22	Pioneer Hi-Bred International Inc.	4	hybrid
US-7078603-B2	Hybrid maize 32R38	Pioneer Hi-Bred International Inc.	5	hybrid
US-7166784-B2	Hybrid maize 33A84	Pioneer Hi-Bred International Inc.	4	hybrid
US-7094957-B2	Hybrid maize 33D11	Pioneer Hi-Bred International Inc.	5	hybrid
US-7041887-B2	Hybrid maize 33D63	Pioneer Hi-Bred International Inc.	5	hybrid
US-7041886-B2	Hybrid maize 33F36	Pioneer Hi-Bred International Inc.	4	hybrid
US-7161074-B2	Hybrid maize 33H25	Pioneer Hi-Bred International Inc.	5	hybrid
US-7067727-B2	Hybrid maize 33K39	Pioneer Hi-Bred International Inc.	4	hybrid
US-7053285-B2	Hybrid maize 33M05	Pioneer Hi-Bred International Inc.	5	hybrid
US-7098390-B2	Hybrid maize 33M72	Pioneer Hi-Bred International Inc.	4	hybrid
US-6933427-B2	Hybrid maize 33N09	Pioneer Hi-Bred International Inc.	4	hybrid
US-7045692-B2	Hybrid maize 33N29	Pioneer Hi-Bred International Inc.	5	hybrid
US-7262347-B2	Hybrid maize 33N49	Pioneer Hi-Bred International Inc.	4	hybrid
US-7129402-B2	Hybrid maize 33N56	Pioneer Hi-Bred International Inc.	4	hybrid
US-7064256-B2	Hybrid maize 33V62	Pioneer Hi-Bred International Inc.	4	hybrid
US-7087821-B2	Hybrid maize 33Y45	Pioneer Hi-Bred International Inc.	5	hybrid
US-7102064-B2	Hybrid maize 34A15	Pioneer Hi-Bred International Inc.	5	hybrid
US-7230171-B2	Hybrid maize 34A86	Pioneer Hi-Bred International Inc.	5	hybrid
US-7053284-B1	Hybrid maize 34B39	Pioneer Hi-Bred International Inc.	5	hybrid
US-7094956-B2	Hybrid maize 34F41	Pioneer Hi-Bred International Inc.	4	hybrid
US-7084332-B2	Hybrid maize 34P88	Pioneer Hi-Bred International Inc.	5	hybrid
US-7112731-B2	Hybrid maize 35A30	Pioneer Hi-Bred International Inc.	5	hybrid
US-7115802-B2	Hybrid maize 35D28	Pioneer Hi-Bred International Inc.	4	hybrid
US-7034214-B2	Hybrid maize 35Y33	Pioneer Hi-Bred International Inc.	5	hybrid
US-7064255-B2	Hybrid maize 36K67	Pioneer Hi-Bred International Inc.	4	hybrid
US-7053283-B2	Hybrid maize 36W66	Pioneer Hi-Bred International Inc.	5	hybrid
US-7026533-B2	Hybrid maize 37A91	Pioneer Hi-Bred International Inc.	4	hybrid
US-6989479-B2	Hybrid maize 37F73	Pioneer Hi-Bred International Inc.	5	hybrid
US-7157632-B2	Hybrid maize 37K84	Pioneer Hi-Bred International Inc.	4	hybrid
US-7164069-B2	Hybrid maize 38B12	Pioneer Hi-Bred International Inc.	5	hybrid
US-7030303-B2	Hybrid maize 38B85	Pioneer Hi-Bred International Inc.	4	hybrid
US-7169985-B2	Hybrid maize 38T41	Pioneer Hi-Bred International Inc.	5	hybrid
US-7112729-B2	Hybrid maize 38W21	Pioneer Hi-Bred International Inc.	4	hybrid
US-7129401-B2	Hybrid maize 39F27	Pioneer Hi-Bred International Inc.	4	hybrid
US-7112728-B2	Hybrid maize 39F59	Pioneer Hi-Bred International Inc.	4	hybrid
US-6018109-A	Hybrid maize plant & seed	Pioneer Hi-Bred International Inc.	98	hybrid
US-5827940-A	Hybrid maize plant & seed (3231)	Pioneer Hi-Bred International Inc.	96	hybrid
US-5728921-A	Hybrid maize plant & seed (3260)	Pioneer Hi-Bred International Inc.	96	hybrid
US-5767344-A	Hybrid maize plant & seed (32H39)	Pioneer Hi-Bred International Inc.	97	hybrid
US-5731497-A	Hybrid maize plant & seed (3310)	Pioneer Hi-Bred International Inc.	96	hybrid
US-5767347-A	Hybrid maize plant & seed (33Y18)	Pioneer Hi-Bred Intl Inc.	97	hybrid
US-5773682-A	Hybrid maize plant & seed (3568)	Pioneer Hi-Bred International Inc.	96	hybrid
US-5585537-A	Hybrid maize plant & seed (3753)	Pioneer Hi-Bred International Inc.	95	hybrid
US-5750842-A	Hybrid maize plant & seed (3914)	Pioneer Hi-Bred International Inc.	96	hybrid
US-5585538-A	Hybrid maize plant & seed (3936)	Pioneer Hi-Bred International Inc.	95	hybrid
US-5750838-A	Hybrid maize plant & seed (3941)	Pioneer Hi-Bred International Inc.	96	hybrid
US-6897364-B1	Hybrid maize plant & seed 32W86	Pioneer Hi-Bred International Inc.	2	hybrid
US-6995304-B1	Hybrid maize plant & seed 33H05	Pioneer Hi-Bred International Inc.	3	hybrid
US-6781041-B1	Hybrid maize plant & seed 34B97	Pioneer Hi-Bred International Inc.	1	hybrid
US-6087566-A	Hybrid maize plant & seed 34F40	Pioneer Hi-Bred International Inc.	98	hybrid
US-6835877-B1	Hybrid maize plant & seed 34M94	Pioneer Hi-Bred International Inc.	1	hybrid
US-6307132-B1	Hybrid maize plant & seed 34T38	Pioneer Hi-Bred International Inc.	99	hybrid
US-6897365-B1	Hybrid maize plant & seed 37D03	Pioneer Hi-Bred International Inc.	2	hybrid
US-6777596-B1	Hybrid maize plant & seed 38A24	Pioneer Hi-Bred International Inc.	0	hybrid
US-6979763-B1	Hybrid maize plant & seed 38G60	Pioneer Hi-Bred International Inc.	3	hybrid
US-6806407-B1	Hybrid maize plant & seed 38T27	Pioneer Hi-Bred International Inc.	0	hybrid
US-6911587-B1	Hybrid maize plant & seed 39B01	Pioneer Hi-Bred International Inc.	2	hybrid
US-6809242-B1	Hybrid maize plant & seed 39K40	Pioneer Hi-Bred International Inc.	1	hybrid
US-6303851-B1	Hybrid maize plant & seed 39n03	Pioneer Hi-Bred International Inc.	99	hybrid
US-6054639-A	Hybrid maize plant & seed 39R52	Pioneer Hi-Bred International Inc.	98	hybrid
US-6750384-B1	Hybrid maize plant & seed 39R62	Pioneer Hi-Bred International Inc.	1	hybrid
US-5977457-A	Hybrid maize plant & seed 39T68	Pioneer Hi-Bred International Inc.	98	hybrid
US-6936755-B1	Hybrid maize plant and seed	Pioneer Hi-Bred International Inc.	1	hybrid
US-6326530-B1	Hybrid maize plant and seed	Pioneer Hi-Bred International Inc.	99	hybrid
US-6800796-B1	Hybrid maize plant and seed	Pioneer Hi-Bred International Inc.	1	hybrid
US-6858785-B1	Hybrid maize plant and seed	Pioneer Hi-Bred International Inc.	1	hybrid
US-5731499-A	Hybrid maize plant and seed (3153)	Pioneer Hi-Bred International Inc.	96	hybrid
US-5602312-A	Hybrid maize plant and seed (3223)	Pioneer Hi-Bred International Inc.	95	hybrid
US-5844118-A	Hybrid maize plant and seed (32K61)	Pioneer Hi-Bred International Inc.	97	hybrid
US-6075187-A	Hybrid maize plant and seed (33G26)	Stucker; David Scott	98	hybrid
US-5942669-A	Hybrid maize plant and seed (3476)	Pioneer Hi-Bred International Inc.	96	hybrid
US-5767343-A	Hybrid maize plant and seed (34E79)	Pioneer Hi-Bred International Inc.	97	hybrid
US-5859318-A	Hybrid maize plant and seed (34G81)	Pioneer Hi-Bred International Inc.	97	hybrid
US-5902921-A	Hybrid maize plant and seed (34K77)	Pioneer Hi-Bred International Inc.	97	hybrid
US-5811650-A	Hybrid maize plant and seed (34M55)	Pioneer Hi-Bred International Inc.	97	hybrid
US-5804691-A	Hybrid maize plant and seed (35R57)	Pioneer Hi-Bred International Inc.	97	hybrid
US-5689036-A	Hybrid maize plant and seed (3730)	Pioneer Hi-Bred International Inc.	95	hybrid
US-5811638-A	Hybrid maize plant and seed (3743E)	Pioneer Hi-Bred International Inc.	96	hybrid
US-5859320-A	Hybrid maize plant and seed (37M81)	Pioneer Hi-Bred International Inc.	97	hybrid
US-5731494-A	Hybrid maize plant and seed (3820)	Pioneer Hi-Bred International Inc.	96	hybrid
US-5728920-A	Hybrid maize plant and seed (3970)	Pioneer Hi-Bred International Inc.	96	hybrid
US-5773684-A	Hybrid maize plant and seed (39B42)	Pioneer Hi-Bred International Inc.	97	hybrid
US-6965063-B1	Hybrid maize plant and seed 30A29	Pioneer Hi-Bred International Inc.	2	hybrid
US-7262350-B2	Hybrid maize plant and seed 31D58	Pioneer Hi-Bred International Inc.	6	hybrid
US-6914178-B1	Hybrid maize plant and seed 31G66	Pioneer Hi-Bred International Inc.	3	hybrid
US-6333452-B1	Hybrid maize plant and seed 31G98	Pioneer Hi-Bred International Inc.	0	hybrid
US-6974899-B1	Hybrid maize plant and seed 31N27	Pioneer Hi-Bred International Inc.	2	hybrid
US-7317154-B2	Hybrid maize plant and seed 31P41	Pioneer Hi-Bred International Inc.	6	hybrid
US-6147285-A	Hybrid maize plant and seed 32A59	Pioneer Hi-Bred International Inc.	99	hybrid
US-6927326-B1	Hybrid maize plant and seed 32A85	Pioneer Hi-Bred International Inc.	2	hybrid
US-7049499-B1	Hybrid maize plant and seed 32B33	Pioneer Hi-Bred International Inc.	3	hybrid
US-7202403-B2	Hybrid maize plant and seed 32B81	Pioneer Hi-Bred International Inc.	6	hybrid
US-6111173-A	Hybrid maize plant and seed 32G94	Pioneer Hi-Bred International Inc.	99	hybrid
US-7199294-B2	Hybrid maize plant and seed 32H20	Pioneer Hi-Bred International Inc.	6	hybrid
US-6747193-B1	Hybrid maize plant and seed 32H58	Pioneer Hi-Bred International Inc.	1	hybrid
US-6005172-A	Hybrid maize plant and seed 32J49	Pioneer Hi-Bred International Inc.	98	hybrid
US-5929311-A	Hybrid maize plant and seed 32J55	Pioneer Hi-Bred International Inc.	97	hybrid
US-6114612-A	Hybrid maize plant and seed 32K72	Pioneer Hi-Bred International Inc.	99	hybrid
US-6114607-A	Hybrid maize plant and seed 32P75	Pioneer Hi-Bred International Inc.	98	hybrid
US-6335476-B1	Hybrid maize plant and seed 32R42	Pioneer Hi-Bred International Inc.	0	hybrid
US-6919499-B1	Hybrid maize plant and seed 32T78	Pioneer Hi-Bred International Inc.	2	hybrid
US-6284953-B1	Hybrid maize plant and seed 32Y52	Pioneer Hi-Bred International Inc.	99	hybrid
US-6087565-A	Hybrid maize plant and seed 32Y65	Pioneer Hi-Bred International Inc.	98	hybrid
US-6797867-B1	Hybrid maize plant and seed 33A72	Pioneer Hi-Bred International Inc.	1	hybrid
US-6114614-A	Hybrid maize plant and seed 33B50	Pioneer Hi-Bred International Inc.	99	hybrid
US-6900377-B1	Hybrid maize plant and seed 33D31	Pioneer Hi-Bred International Inc.	2	hybrid
US-7211718-B2	Hybrid maize plant and seed 33G58	Pioneer Hi-Bred International Inc.	6	hybrid
US-5936147-A	Hybrid maize plant and seed 33H67	Pioneer Hi-Bred International Inc.	98	hybrid
US-6156958-A	Hybrid maize plant and seed 33J24	Pioneer Hi-Bred International Inc.	99	hybrid
US-6329579-B1	Hybrid maize plant and seed 33J56	Pioneer Hi-Bred International Inc.	99	hybrid
US-6410829-B1	Hybrid maize plant and seed 33K81	Pioneer Hi-Bred International Inc.	99	hybrid
US-7005566-B1	Hybrid maize plant and seed 33M54	Pioneer Hi-Bred International Inc.	3	hybrid
US-6180857-B1	Hybrid maize plant and seed 33P66	Pioneer Hi-Bred International Inc.	99	hybrid
US-6784347-B1	Hybrid maize plant and seed 33R77	Pioneer Hi-Bred International Inc.	1	hybrid
US-6734347-B1	Hybrid maize plant and seed 33T17	Pioneer Hi-Bred International Inc.	0	hybrid
US-6995305-B1	Hybrid maize plant and seed 33T39	Pioneer Hi-Bred International Inc.	3	hybrid
US-7232946-B2	Hybrid maize plant and seed 33T56	Pioneer Hi-Bred International Inc.	6	hybrid
US-7009094-B1	Hybrid maize plant and seed 33V15	Pioneer Hi-Bred International Inc.	3	hybrid
US-6107551-A	Hybrid maize plant and seed 33Y11	Pioneer Hi-Bred International Inc.	99	hybrid
US-7271327-B2	Hybrid maize plant and seed 33Y74	Pioneer Hi-Bred International Inc.	6	hybrid
US-5990392-A	Hybrid maize plant and seed 34A03	Pioneer Hi-Bred International Inc.	98	hybrid
US-6924421-B1	Hybrid maize plant and seed 34D71	Pioneer Hi-Bred International Inc.	2	hybrid
US-6831215-B1	Hybrid maize plant and seed 34G13	Pioneer Hi-Bred International Inc.	0	hybrid
US-6897360-B1	Hybrid maize plant and seed 34H31	Pioneer Hi-Bred International Inc.	2	hybrid
US-6743970-B1	Hybrid maize plant and seed 34N16	Pioneer Hi-Bred International Inc.	1	hybrid
US-6900378-B1	Hybrid maize plant and seed 34N43	Pioneer Hi-Bred International Inc.	2	hybrid
US-6087564-A	Hybrid maize plant and seed 34P93	Pioneer Hi-Bred International Inc.	98	hybrid
US-6188000-B1	Hybrid maize plant and seed 34V98	Pioneer Hi-Bred International Inc.	99	hybrid
US-6211445-B1	Hybrid maize plant and seed 34W67	Pioneer Hi-Bred International Inc.	99	hybrid
US-5763750-A	Hybrid maize plant and seed 3559	Gogerty; Joseph Kevin Martin; Philip Richard Roundy; Theron Eugene	96	hybrid
US-6984778-B1	Hybrid maize plant and seed 35D45	Pioneer Hi-Bred International Inc.	2	hybrid
US-7196255-B2	Hybrid maize plant and seed 35F38	Pioneer Hi-Bred International Inc.	6	hybrid
US-6297433-B1	Hybrid maize plant and seed 35H53	Pioneer Hi-Bred International Inc.	0	hybrid
US-6160211-A	Hybrid maize plant and seed 35P12	Pioneer Hi-Bred International Inc.	99	hybrid
US-7220901-B2	Hybrid maize plant and seed 35T06	Pioneer Hi-Bred International Inc.	6	hybrid
US-6756529-B1	Hybrid maize plant and seed 35Y54	Pioneer Hi-Bred International Inc.	1	hybrid
US-5981854-A	Hybrid maize plant and seed 36A43	Pioneer Hi-Bred International Inc.	98	hybrid
US-6169234-B1	Hybrid maize plant and seed 36B08	Pioneer Hi-Bred International Inc.	99	hybrid
US-6288310-B1	Hybrid maize plant and seed 36D14	Pioneer Hi-Bred International Inc.	99	hybrid
US-6265646-B1	Hybrid maize plant and seed 36G12	Pioneer Hi-Bred International Inc.	99	hybrid
US-6096951-A	Hybrid maize plant and seed 36G32	Pioneer Hi-Bred International Inc.	98	hybrid
US-6018110-A	Hybrid maize plant and seed 36H36	Pioneer Hi-Bred International Inc.	12	hybrid
US-8796517-B1	Maize hybrid X00C185	Pioneer Hi-Bred International Inc.	12	hybrid
US-8674174-B1	Maize hybrid X00C219	Pioneer Hi Bred International Inc	13	hybrid
US-9351460-B1	Maize hybrid X00D864	Pioneer Hi-Bred International Inc.	13	hybrid
US-9402359-B1	Maize hybrid X00D886	Pioneer Hi-Bred International Inc.	13	hybrid
US-9468173-B1	Maize hybrid X00F905	Pioneer Hi-Bred International Inc.	12	hybrid
US-8785723-B1	Maize hybrid X03C209	Pioneer Hi Bred International Inc	12	hybrid
US-8692089-B1	Maize hybrid X03C220	Pioneer Hi Bred International Inc	12	hybrid
US-8791345-B1	Maize hybrid X03C238	Pioneer Hi-Bred International Inc.	12	hybrid
US-8822779-B1	Maize hybrid X03C269	Pioneer Hi-Bred International Inc.	12	hybrid
US-8865980-B1	Maize hybrid X03C270	Pioneer Hi Bred International Inc	12	hybrid
US-9277704-B1	Maize hybrid X03D524	Pioneer Hi-Bred International Inc.	13	hybrid
US-9149016-B1	Maize hybrid X03D530	Pioneer Hi-Bred International Inc.	13	hybrid
US-9504220-B2	Maize hybrid X03F652	Pioneer Hi-Bred International Inc.	14	hybrid
US-9516836-B1	Maize hybrid X03F656	Pioneer Hi-Bred International Inc.	14	hybrid
US-9357733-B2	Maize hybrid X03F667	Pioneer Hi-Bred International Inc.	16	hybrid
US-9826695-B1	Maize hybrid X05H211	Pioneer Hi-Bred International Inc.	16	hybrid
US-9861065-B1	Maize hybrid X05H223	Pioneer Hi-Bred International Inc.	16	hybrid
US-9832948-B2	Maize hybrid X05H226	Pioneer Hi-Bred International Inc.	16	hybrid
US-9955650-B1	Maize hybrid X05K656	Pioneer Hi-Bred International Inc.	17	hybrid
US-9936666-B1	Maize hybrid X05K658	Pioneer Hi-Bred International Inc.	17	hybrid
US-9872475-B1	Maize hybrid X05K660	Pioneer Hi-Bred International Inc.	17	hybrid
US-9955656-B1	Maize hybrid X05K682	Pioneer Hi-Bred International Inc.	17	hybrid
US-9924687-B1	Maize hybrid X05K684	Pioneer Hi-Bred International Inc.	17	hybrid
US-10085407-B1	Maize hybrid X05K690	Pioneer Hi-Bred International Inc.	17	hybrid
US-9936664-B1	Maize hybrid X05K698	Pioneer Hi-Bred International Inc.	17	hybrid
US-9877456-B1	Maize hybrid X05K734	Pioneer Hi-Bred International Inc.	17	hybrid
US-10117396-B1	Maize hybrid X05K746	Pioneer Hi-Bred International Inc.	17	hybrid
US-8609929-B1	Maize hybrid X08B730	Pioneer Hi Bred International Inc	12	hybrid
US-8975491-B1	Maize hybrid X08B746	Pioneer Hi Bred International Inc	12	hybrid
US-8710323-B1	Maize hybrid X08B748	Pioneer Hi-Bred International Inc.	12	hybrid
US-8901400-B1	Maize hybrid X08C858	Pioneer Hi Bred International Inc	12	hybrid
US-8674195-B1	Maize hybrid X08C859	Pioneer Hi Bred International Inc	12	hybrid
US-8723004-B1	Maize hybrid X08C866	Pioneer Hi Bred International Inc	12	hybrid
US-8937228-B1	Maize hybrid X08C872	Pioneer Hi Bred International Inc	12	hybrid
US-8686253-B1	Maize hybrid X08C909	Pioneer Hi Bred International Inc	12	hybrid
US-9000277-B1	Maize hybrid X08C921	Pioneer Hi Bred International Inc.	12	hybrid
US-8889966-B1	Maize hybrid X08C922	Pioneer Hi Bred International Inc	12	hybrid
US-8962949-B1	Maize hybrid X08C923	Pioneer Hi Bred International Inc	12	hybrid
US-8729369-B1	Maize hybrid X08C937	Pioneer Hi Bred International Inc	12	hybrid
US-8748715-B1	Maize hybrid X08C942	Pioneer Hi-Bred International Inc.	12	hybrid
US-8901401-B1	Maize hybrid X08C951	Pioneer Hi Bred International Inc	12	hybrid
US-8969674-B1	Maize hybrid X08C957	Pioneer Hi Bred International Inc	12	hybrid
US-9049824-B1	Maize hybrid X08C960	Pioneer Hi Bred International Inc	12	hybrid
US-8957289-B1	Maize hybrid X08C961	Pioneer Hi Bred International	12	hybrid
US-8754306-B1	Maize hybrid X08C962	Pioneer Hi-Bred International Inc.	12	hybrid
US-8766060-B1	Maize hybrid X08C963	Pioneer Hi-Bred International Inc.	12	hybrid
US-8759635-B1	Maize hybrid X08C967	Pioneer Hi-Bred International Inc.	12	hybrid
US-8686249-B1	Maize hybrid X08C971	Pioneer Hi Bred International Inc	12	hybrid
US-8872005-B1	Maize hybrid X08C980	Pioneer Hi Bred International Inc	12	hybrid
US-8895820-B1	Maize hybrid X08C981	Pioneer Hi Bred International Inc	12	hybrid
US-8927829-B1	Maize hybrid X08C982	Pioneer Hi Bred International Inc	12	hybrid
US-8759634-B1	Maize hybrid X08C983	Pioneer Hi-Bred International Inc.	12	hybrid
US-8772609-B1	Maize hybrid X08C986	Pioneer Hi-Bred International Inc.	12	hybrid
US-8841519-B1	Maize hybrid X08C990	Pioneer Hi Bred International Inc	12	hybrid
US-9006537-B1	Maize hybrid X08C995	Pioneer Hi Bred International Inc	12	hybrid
US-9456567-B1	Maize hybrid X08D363	Pioneer Hi-Bred International Inc.	13	hybrid
US-9006541-B1	Maize hybrid X08D365	Pioneer Hi Bred International Inc	13	hybrid
US-9326471-B1	Maize hybrid X08D384	Pioneer Hi-Bred International Inc.	13	hybrid
US-9035146-B1	Maize hybrid X08D387	Pioneer Hi Bred International Inc	13	hybrid
US-9226468-B1	Maize hybrid X08D395	Pioneer Hi Bred International Inc	13	hybrid
US-9006539-B1	Maize hybrid X08D399	Pioneer Hi Bred International Inc.	13	hybrid
US-9326475-B1	Maize hybrid X08D413	Pioneer Hi-Bred International Inc.	13	hybrid
US-8993857-B1	Maize hybrid X08D419	Pioneer Hi Bred International Inc	13	hybrid
US-9089101-B1	Maize hybrid X08D422	Pioneer Hi-Bred International Inc	13	hybrid
US-9000280-B1	Maize hybrid X08D452	Pioneer Hi Bred International Inc	13	hybrid
US-9456566-B1	Maize hybrid X08D453	Pioneer Hi-Bred International Inc.	13	hybrid
US-9161503-B1	Maize hybrid X08D455	Pioneer Hi-Bred International Inc.	13	hybrid
US-9006540-B1	Maize hybrid X08D456	Pioneer Hi Bred International Inc	13	hybrid
US-9179621-B1	Maize hybrid X08D489	Pioneer Hi-Bred International Inc.	13	hybrid
US-9282702-B1	Maize hybrid X08D492	Pioneer Hi-Bred International Inc.	13	hybrid
US-9012744-B1	Maize hybrid X08D500	Pioneer Hi Bred International Inc	13	hybrid
US-9089100-B1	Maize hybrid X08D508	Pioneer Hi Bred International Inc	13	hybrid
US-9737018-B1	Maize hybrid X08D517HR	Pioneer Hi-Bred International Inc.	16	hybrid
US-9078408-B1	Maize hybrid X08D519	Pioneer Hi Bred International Inc	13	hybrid
US-9084402-B1	Maize hybrid X08D522	Pioneer Hi Bred International Inc	13	hybrid
US-9398751-B1	Maize hybrid X08F014	Pioneer Hi-Bred International Inc.	14	hybrid
US-9699985-B1	Maize hybrid X08F022	Pioneer Hi-Bred International Inc.	14	hybrid
US-9426959-B1	Maize hybrid X08F046	Pioneer Hi-Bred International Inc.	14	hybrid
US-9374964-B1	Maize hybrid X08F049	Pioneer Hi-Bred International Inc.	14	hybrid
US-9565818-B1	Maize hybrid X08F070	Pioneer Hi-Bred International Inc.	14	hybrid
US-9445572-B1	Maize hybrid X08F093	Pioneer Hi-Bred International Inc.	14	hybrid
US-9433176-B1	Maize hybrid X08F109	Pioneer Hi-Bred International Inc.	14	hybrid
US-9468174-B1	Maize hybrid X08F118	Pioneer Hi-Bred International Inc.	14	hybrid
US-9504221-B1	Maize hybrid X08F120	Pioneer Hi-Bred International Inc.	14	hybrid
US-9474228-B1	Maize hybrid X08F124	Pioneer Hi-Bred International Inc.	14	hybrid
US-9480227-B1	Maize hybrid X08F129	Pioneer Hi-Bred International Inc.	14	hybrid
US-9877447-B1	Maize hybrid X08H721	Pioneer Hi-Bred International Inc.	16	hybrid
US-9686949-B1	Maize hybrid X08H731	Pioneer Hi-Bred International Inc.	16	hybrid
US-9861058-B1	Maize hybrid X08H734	Pioneer Hi-Bred International Inc.	16	hybrid
US-9770002-B1	Maize hybrid X08H755	Pioneer Hi-Bred International Inc.	16	hybrid
US-9867358-B1	Maize hybrid X08H786	Pioneer Hi-Bred International Inc.	17	hybrid
US-9814203-B1	Maize hybrid X08H806	Pioneer Hi-Bred International Inc.	16	hybrid
US-9861060-B1	Maize hybrid X08H823	Pioneer Hi-Bred International Inc.	16	hybrid
US-9814200-B1	Maize hybrid X08H824	Pioneer Hi-Bred International Inc.	16	hybrid
US-9826694-B1	Maize hybrid X08H838	Pioneer Hi-Bred International Inc.	16	hybrid
US-9877454-B1	Maize hybrid X08K186	Pioneer Hi-Bred International Inc.	17	hybrid
US-10085406-B1	Maize hybrid X08K187	Pioneer Hi-Bred International Inc.	17	hybrid
US-10123499-B1	Maize hybrid X08K189	Pioneer Hi-Bred International Inc.	17	hybrid
US-9955655-B1	Maize hybrid X08K202	Pioneer Hi-Bred International Inc.	17	hybrid
US-9872476-B1	Maize hybrid X08K208	Pioneer Hi-Bred International Inc.	17	hybrid
US-9877457-B1	Maize hybrid X08K212	Pioneer Hi-Bred International Inc.	17	hybrid
US-10085405-B1	Maize hybrid X08K219	Pioneer Hi-Bred International Inc.	17	hybrid
US-9877455-B1	Maize hybrid X08K232	Pioneer Hi-Bred International Inc.	17	hybrid
US-9888654-B1	Maize hybrid X08K233	Pioneer Hi-Bred International Inc.	17	hybrid
US-9877458-B1	Maize hybrid X08K235	Pioneer Hi-Bred International Inc.	17	hybrid
US-9936665-B1	Maize hybrid X08K236	Pioneer Hi-Bred International Inc.	17	hybrid
US-10051812-B1	Maize hybrid X08K237	Pioneer Hi-Bred International Inc.	17	hybrid
US-9872473-B1	Maize hybrid X08K238	Pioneer Hi-Bred International Inc.	17	hybrid
US-9872474-B1	Maize hybrid X08K251	Pioneer Hi-Bred International Inc.	17	hybrid
US-10051810-B1	Maize hybrid X08K266	Pioneer Hi-Bred International Inc.	17	hybrid
US-9035159-B1	Maize hybrid X131C721	Pioneer Hi Bred International Inc	12	hybrid
US-8692091-B1	Maize hybrid X13B580	Pioneer Hi Bred International Inc	12	hybrid
US-8927827-B1	Maize hybrid X13C685W	Pioneer Hi Bred International Inc	12	hybrid
US-8785749-B1	Maize hybrid X13C696	Pioneer Hi-Bred International Inc.	12	hybrid
US-8975469-B1	Maize hybrid X13C704HR	Pioneer Hi Bred International Inc	12	hybrid
US-8742234-B1	Maize hybrid X13C714	Pioneer Hi-Bred International Inc.	12	hybrid
US-8809646-B1	Maize hybrid X13C726	Pioneer Hi-Bred International Inc.	12	hybrid
US-8748716-B1	Maize hybrid X13C727	Pioneer Hi-Bred International Inc.	12	hybrid
US-8716573-B1	Maize hybrid X13C733	Pioneer Hi-Bred International Inc.	12	hybrid
US-8822781-B1	Maize hybrid X13C736	Pioneer Hi-Bred International Inc.	12	hybrid
US-8937227-B1	Maize hybrid X13C737	Pioneer Hi Bred International Inc	12	hybrid
US-8704060-B1	Maize hybrid X13C738	Pioneer Hi Bred International Inc	12	hybrid
US-8809645-B1	Maize hybrid X13C755	Pioneer Hi-Bred International Inc.	12	hybrid
US-8766058-B1	Maize hybrid X13C761	Pioneer Hi-Bred International Inc.	12	hybrid
US-8927826-B1	Maize hybrid X13C762	Pioneer Hi Bred International Inc	12	hybrid
US-8822782-B1	Maize hybrid X13C764	Pioneer Hi-Bred International Inc.	12	hybrid
US-8809642-B1	Maize hybrid X13C788	Pioneer Hi-Bred International Inc.	12	hybrid
US-8927825-B1	Maize hybrid X13C790	Pioneer Hi Bred International Inc	12	hybrid
US-8987566-B1	Maize hybrid X13C791	Pioneer Hi Bred International Inc	12	hybrid
US-9144210-B1	Maize hybrid X13D043	Pioneer Hi-Bred International Inc.	13	hybrid
US-8993859-B1	Maize hybrid X13D062	Pioneer Hi Bred International Inc	13	hybrid
US-9024152-B1	Maize hybrid X13D063	Pioneer Hi Bred International Inc	13	hybrid
US-9326472-B1	Maize hybrid X13D088	Pioneer Hi Bred International Inc	13	hybrid
US-9144211-B1	Maize hybrid X13D093	Pioneer Hi-Bred International Inc	13	hybrid
US-9012743-B1	Maize hybrid X13D095	Pioneer Hi Bred International Inc	13	hybrid
US-9084408-B1	Maize hybrid X13D099	Pioneer Hi Bred International Inc	13	hybrid
US-9277707-B1	Maize hybrid X13D102	Pioneer Hi-Bred International Inc.	13	hybrid
US-9204604-B1	Maize hybrid X13D121	Pioneer Hi-Bred International Inc	13	hybrid
US-9510537-B1	Maize hybrid X13F218W	Pioneer Hi-Bred International Inc.	14	hybrid
US-9313989-B1	Maize hybrid X13F265	Pioneer Hi-Bred International Inc.	14	hybrid
US-9699993-B1	Maize hybrid X13F338	Pioneer Hi-Bred International Inc.	14	hybrid
US-9456570-B1	Maize hybrid X13F381	Pioneer Hi-Bred International Inc.	14	hybrid
US-9955642-B1	Maize hybrid X13H123	Pioneer Hi-Bred International Inc.	16	hybrid
US-10085408-B1	Maize hybrid X13H147	Pioneer Hi-Bred International Inc.	17	hybrid
US-9955661-B1	Maize hybrid X13H148	Pioneer Hi-Bred International Inc.	17	hybrid
US-10117397-B1	Maize hybrid X13H149	Pioneer Hi-Bred International Inc.	17	hybrid
US-9820454-B1	Maize hybrid X13H829W	Pioneer Hi-Bred International Inc.	16	hybrid
US-9814199-B1	Maize hybrid X13H830W	Pioneer Hi-Bred International Inc.	16	hybrid
US-9861064-B1	Maize hybrid X13H845	Pioneer Hi-Bred International Inc.	16	hybrid
US-9872463-B1	Maize hybrid X13H893	Pioneer Hi-Bred International Inc.	16	hybrid
US-9814201-B1	Maize hybrid X13H898	Pioneer Hi-Bred International Inc.	16	hybrid
US-9872462-B1	Maize hybrid X13H923	Pioneer Hi-Bred International Inc.	16	hybrid
US-9775319-B1	Maize hybrid X13H947	Pioneer Hi-Bred International Inc.	16	hybrid
US-9943060-B1	Maize hybrid X13K450W	Pioneer Hi-Bred International Inc.	17	hybrid
US-9894866-B1	Maize hybrid X13K460	Pioneer Hi-Bred International Inc.	17	hybrid
US-9955660-B1	Maize hybrid X13K464	Pioneer Hi-Bred International Inc.	17	hybrid
US-9955659-B1	Maize hybrid X13K465	Pioneer Hi-Bred International Inc.	17	hybrid
US-9867359-B1	Maize hybrid X13K471	Pioneer Hi-Bred International Inc.	17	hybrid
US-9955657-B1	Maize hybrid X13K478	Pioneer Hi-Bred International Inc.	17	hybrid
US-10064357-B1	Maize hybrid X13K480	Pioneer Hi-Bred International Inc.	17	hybrid
US-9936663-B1	Maize hybrid X13K484	Pioneer Hi-Bred International Inc.	17	hybrid
US-9936667-B1	Maize hybrid X13K485	Pioneer Hi-Bred International Inc.	17	hybrid
US-9936668-B1	Maize hybrid X13K494	Pioneer Hi-Bred International Inc.	17	hybrid
US-10051828-B1	Maize hybrid X13K495	Pioneer Hi-Bred International Inc.	17	hybrid
US-10085404-B1	Maize hybrid X13K502	Pioneer Hi-Bred International Inc.	17	hybrid
US-9986706-B1	Maize hybrid X13K509	Pioneer Hi-Bred International Inc.	17	hybrid
US-9955658-B1	Maize hybrid X13K527	Pioneer Hi-Bred International Inc.	17	hybrid
US-10117395-B1	Maize hybrid X13K534	Pioneer Hi-Bred International Inc.	17	hybrid
US-9968060-B1	Maize hybrid X13K543	Pioneer Hi-Bred International Inc.	17	hybrid
US-10028465-B1	Maize hybrid X13K545	Pioneer Hi-Bred International Inc.	17	hybrid
US-9861068-B1	Maize hybrid X15K700	Pioneer Hi-Bred International Inc.	17	hybrid
US-9888653-B1	Maize hybrid X15K726	Pioneer Hi-Bred International Inc.	17	hybrid
US-10028464-B1	Maize hybrid X15K728	Pioneer Hi-Bred International Inc.	17	hybrid
US-8829307-B1	Maize hybrid X18C101	Pioneer Hi-Bred International Inc.	12	hybrid
US-8916755-B1	Maize hybrid X18C104	Pioneer Hi Bred International Inc	12	hybrid
US-8748713-B1	Maize hybrid X18C110	Pioneer Hi Bred International Inc	12	hybrid
US-8704057-B1	Maize hybrid X18C111	Pioneer Hi Bred International Inc	12	hybrid
US-8829303-B1	Maize hybrid X18C117	Pioneer Hi-Bred International Inc.	12	hybrid
US-9288957-B1	Maize hybrid X18D794	Pioneer Hi-Bred International Inc.	16	hybrid
US-9943050-B1	Maize hybrid X18H540	Pioneer Hi-Bred International Inc.	13	hybrid
US-9332701-B1	Maize hybrid X95D040	Pioneer Hi-Bred International Inc.	13	hybrid
US-9012742-B1	Maize hybrid X95D061	Pioneer Hi Bred International Inc	13	hybrid
US-9144218-B1	Maize hybrid X95D076	Pioneer Hi-Bred International Inc.	16	hybrid
US-9872461-B1	Maize hybrid X95H691	Pioneer Hi-Bred International Inc.	16	hybrid
US-9781894-B1	Maize hybrid X95H708	Pioneer Hi-Bred International Inc.	16	hybrid
US-9867360-B1	Maize hybrid X95K895	Pioneer Hi-Bred International Inc.	17	hybrid
US-10104858-B1	Maize hybrid X95K896	Pioneer Hi-Bred International Inc.	17	hybrid
US-9955653-B1	Maize hybrid X95K897	Pioneer Hi-Bred International Inc.	17	hybrid
US-9980454-B1	Maize hybrid X95K902	Pioneer Hi-Bred International Inc.	17	hybrid
US-9888655-B1	Maize hybrid X95K904	Pioneer Hi-Bred International Inc.	17	hybrid
US-9986707-B1	Maize hybrid X95K912	Pioneer Hi-Bred International Inc.	17	hybrid
US-10117413-B2	Maize hybrid X95K918	Pioneer Hi-Bred International Inc.	17	hybrid
US-10098300-B1	Maize hybrid X95K956YXR	Pioneer Hi-Bred International Inc.	17	hybrid
US-9907275-B1	Maize hybrid X95K958	Pioneer Hi-Bred International Inc.	17	hybrid
US-8907160-B1	Maize inbred PH1V5T	Pioneer Hi Bred International Inc	13	hybrid
US-8063287-B1	Maize variety hybrid 10005820	Pioneer Hi-Bred International Inc.	9	hybrid
US-8063288-B1	Maize variety hybrid 10025320	Pioneer Hi-Bred International Inc.	9	hybrid
US-8071866-B1	Maize variety hybrid 10027890	Pioneer Hi-Bred International Inc.	9	hybrid
US-8237030-B1	Maize variety hybrid 10028290	Pioneer Hi Bred International Inc	9	hybrid
US-8097797-B1	Maize variety hybrid 10031640	Pioneer Hi-Bred International Inc.	9	hybrid
US-8035015-B1	Maize variety hybrid 10034320	Pioneer Hi-Bred International Inc.	9	hybrid
US-8252998-B1	Maize variety hybrid 10045290	Pioneer Hi Bred International Inc	9	hybrid
US-8058534-B1	Maize variety hybrid 10047410	Pioneer Hi-Bred International Inc.	9	hybrid
US-8058538-B1	Maize variety hybrid 10054690	Pioneer Hi-Bred International Inc.	9	hybrid
US-8791343-B1	Maize variety hybrid 10076890	Pioneer Hi-Bred International Inc.	9	hybrid
US-8058539-B1	Maize variety hybrid 10077230	Pioneer Hi-Bred International Inc.	9	hybrid
US-8039716-B1	Maize variety hybrid 10085650	Pioneer Hi-Bred International Inc.	9	hybrid
US-8232464-B1	Maize variety hybrid 10094720	Pioneer Hi Bred International Inc	9	hybrid
US-8058530-B1	Maize variety hybrid 10105890	Pioneer Hi-Bred International Inc.	9	hybrid
US-8252989-B1	Maize variety hybrid 10112250	Pioneer Hi Bred International Inc	9	hybrid
US-8039717-B1	Maize variety hybrid 10119570	Pioneer Hi-Bred International Inc.	9	hybrid
US-8242337-B1	Maize variety hybrid 10124870	Pioneer Hi Bred International Inc	9	hybrid
US-8124858-B1	Maize variety hybrid 10126280	Pioneer Hi-Bred International Inc.	9	hybrid
US-8735696-B1	Maize variety hybrid 10137650	Pioneer Hi Bred International Inc	9	hybrid
US-8258377-B1	Maize variety hybrid 10138200	Pioneer Hi Bred International Inc	9	hybrid
US-8008555-B1	Maize variety hybrid 10139630	Pioneer Hi-Bred International Inc.	9	hybrid
US-8314313-B1	Maize variety hybrid 10143760	Pioneer Hi Bred International Inc	9	hybrid
US-8058537-B1	Maize variety hybrid 10147840	Pioneer Hi-Bred International Inc.	9	hybrid
US-9232704-B1	Maize variety hybrid 10151390	Pioneer Hi-Bred International Inc.	9	hybrid
US-8058536-B1	Maize variety hybrid 10157970	Pioneer Hi-Bred International Inc.	9	hybrid
US-8058535-B1	Maize variety hybrid 10159360	Pioneer Hi-Bred International Inc.	9	hybrid
US-8278537-B1	Maize variety hybrid 10163930	Pioneer Hi Bred International Inc	9	hybrid
US-8053654-B1	Maize variety hybrid 10167860	Pioneer Hi-Bred International Inc.	9	hybrid
US-8173879-B1	Maize variety hybrid 10173980	Pioneer Hi-Bred International Inc.	9	hybrid
US-8058533-B1	Maize variety hybrid 10183480	Pioneer Hi-Bred International Inc.	9	hybrid
US-8222502-B1	Maize variety hybrid 10216740	Pioneer Hi Bred International Inc.	9	hybrid
US-8053653-B1	Maize variety hybrid 10273860	Pioneer Hi-Bred International Inc.	9	hybrid
US-8273972-B1	Maize variety hybrid 10801570	Pioneer Hi Bred International Inc	9	hybrid
US-8445764-B1	Maize variety hybrid 10872490	Pioneer Hi Bred International Inc	9	hybrid
US-8258386-B1	Maize variety hybrid 10905730	Pioneer Hi Bred International Inc	9	hybrid
US-8063289-B1	Maize variety hybrid 10932930	Pioneer Hi-Bred International Inc.	9	hybrid
US-8058532-B1	Maize variety hybrid 10991850	Pioneer Hi-Bred International Inc.	9	hybrid
US-8748710-B1	Maize variety hybrid 38V31	Pioneer Hi-Bred International Inc.	10	hybrid
US-8383885-B1	Maize variety hybrid X00A926	Pioneer Hi Bred International Inc	10	hybrid
US-8324480-B1	Maize variety hybrid X00A929	Pioneer Hi Bred International Inc	10	hybrid
US-8629336-B1	Maize variety hybrid X00B132	Pioneer Hi Bred International Inc	11	hybrid
US-9045768-B1	Maize variety hybrid X00B136	Pioneer Hi Bred International Inc	11	hybrid
US-8395031-B1	Maize variety hybrid X00B156	Pioneer Hi Bred International Inc	11	hybrid
US-8367911-B1	Maize variety hybrid X03A112	Pioneer Hi Bred International Inc	10	hybrid
US-8247667-B1	Maize variety hybrid X03A115	Pioneer Hi Bred International Inc	10	hybrid
US-8383908-B1	Maize variety hybrid X03A121	Pioneer Hi Bred International Inc	10	hybrid
US-8710312-B1	Maize variety hybrid X03A157	Pioneer Hi Bred International Inc	10	hybrid
US-9084401-B1	Maize variety hybrid X03A158	Pioneer Hi Bred International Inc	10	hybrid
US-8354575-B1	Maize variety hybrid X03A160	Pioneer Hi Bred International Inc	10	hybrid
US-8431803-B1	Maize variety hybrid X03A178	Pioneer Hi Bred International Inc.	10	hybrid
US-8383907-B1	Maize variety hybrid X03A184	Pioneer Hi Bred International Inc	10	hybrid
US-8247670-B1	Maize variety hybrid X03A188	Pioneer Hi Bred International Inc	10	hybrid
US-8519221-B1	Maize variety hybrid X03A189	Pioneer Hi-Bred International Inc.	10	hybrid
US-8362337-B1	Maize variety hybrid X03A190	Pioneer Hi Bred International Inc	10	hybrid
US-8415543-B1	Maize variety hybrid X03A194	Pioneer Hi Bred International Inc	10	hybrid
US-8319017-B1	Maize variety hybrid X03A195	Pioneer Hi Bred International Inc	10	hybrid
US-8519215-B1	Maize variety hybrid X03B455	Pioneer Hi Bred International Inc	11	hybrid
US-8575455-B1	Maize variety hybrid X03B499	Pioneer Hi Bred International Inc	11	hybrid
US-8865978-B1	Maize variety hybrid X7H292	Pioneer Hi Bred International Inc	9	hybrid
US-7902432-B1	Maize variety hybrid X7H305	Pioneer Hi-Bred International Inc.	9	hybrid
US-8063286-B1	Maize variety hybrid X7K417	Pioneer Hi-Bred International Inc.	9	hybrid
US-8124857-B1	Maize variety hybrid X7K424	Pioneer Hi-Bred International Inc.	9	hybrid
US-7977551-B1	Maize variety hybrid X7K438	Pioneer Hi-Bred International Inc.	9	hybrid
US-8383912-B1	Maize variety hybrid X7K442	Pioneer Hi Bred International Inc	10	hybrid
US-8039715-B1	Maize variety hybrid X7K448	Pioneer Hi-Bred International Inc.	9	hybrid
US-8039714-B1	Maize variety hybrid X7K470	Pioneer Hi-Bred International Inc.	9	hybrid
US-8044281-B1	Maize variety hybrid X7K483	Pioneer Hi-Bred International Inc.	9	hybrid
US-8026431-B1	Maize variety hybrid X7K497	Pioneer Hi-Bred International Inc.	9	hybrid
US-8058528-B1	Maize variety hybrid X7K512	Pioneer Hi-Bred International Inc.	9	hybrid
US-8053650-B1	Maize variety hybrid X7M614	Pioneer Hi-Bred International Inc.	9	hybrid
US-8362331-B1	Maize variety hybrid X7M626	Pioneer Hi Bred International Inc	9	hybrid
US-8273948-B1	Maize variety hybrid X7M651	Pioneer Hi Bred International Inc	10	hybrid
US-8053651-B1	Maize variety hybrid X7M658	Pioneer Hi-Bred International Inc.	9	hybrid
US-8273946-B1	Maize variety hybrid X7M672	Pioneer Hi Bred International Inc	10	hybrid
US-8153868-B1	Maize variety hybrid X7M675	Pioneer Hi-Bred International Inc.	9	hybrid
US-8058527-B1	Maize variety hybrid X7N785	Pioneer Hi-Bred International Inc.	9	hybrid
US-8124856-B1	Maize variety hybrid X7N815	Pioneer Hi-Bred International Inc.	9	hybrid
US-8263825-B1	Maize variety hybrid X7N819	Pioneer Hi Bred International Inc	10	hybrid
US-7985903-B1	Maize variety hybrid X7P212	Pioneer Hi-Bred International Inc.	9	hybrid
US-7977554-B1	Maize variety hybrid X7P215	Pioneer Hi-Bred International Inc.	9	hybrid
US-8354576-B1	Maize variety hybrid X7P246	Pioneer Hi Bred International Inc	9	hybrid
US-8193428-B1	Maize variety hybrid X7R402	Pioneer Hi Bred International Inc	9	hybrid
US-8193427-B1	Maize variety hybrid X7R417	Pioneer Hi Bred International Inc	9	hybrid
US-8273971-B1	Maize variety hybrid X7R421	Pioneer Hi Bred International Inc	10	hybrid
US-8198520-B1	Maize variety hybrid X7S502	Pioneer Hi Bred International Inc	9	hybrid
US-7932446-B1	Maize variety hybrid X7W906	Pioneer Hi-Bred International Inc.	9	hybrid
US-8436237-B1	Maize variety hybrid X80A418	Pioneer Hi Bred International Inc	9	hybrid
US-8373046-B1	Maize variety hybrid X80A457	Pioneer Hi Bred International Inc	10	hybrid
US-8829267-B1	Maize variety hybrid X80B466	Pioneer Hi Bred International Inc	11	hybrid
US-8629320-B1	Maize variety hybrid X80B468	Pioneer Hi Bred International Inc	11	hybrid
US-8426705-B1	Maize variety hybrid X85A660	Pioneer Hi Bred International Inc	10	hybrid
US-8383882-B1	Maize variety hybrid X8N333	Pioneer Hi Bred International Inc	10	hybrid
US-8399733-B1	Maize variety hybrid X8P449	Pioneer Hi Bred International Inc	10	hybrid
US-8344223-B1	Maize variety hybrid X8P483	Pioneer Hi Bred International Inc	10	hybrid
US-8283520-B1	Maize variety hybrid X8R673	Pioneer Hi Bred International Inc	10	hybrid
US-8237034-B1	Maize variety hybrid X90A804	Pioneer Hi Bred International Inc	10	hybrid
US-8829269-B1	Maize variety hybrid X90A809	Pioneer Hi-Bred International Inc.	10	hybrid
US-8536427-B1	Maize variety hybrid X90A810	Pioneer Hi Bred International Inc	10	hybrid
US-8575456-B1	Maize variety hybrid X90B029	Pioneer Hi Bred International Inc	11	hybrid
US-8546664-B1	Maize variety hybrid X90B041	Pioneer Hi Bred International Inc	10	hybrid
US-8350135-B1	Maize variety hybrid X95A939	Pioneer Hi Bred International Inc	10	hybrid
US-8729367-B1	Maize variety hybrid X95A943	Pioneer Hi-Bred International Inc.	10	hybrid
US-8357843-B1	Maize variety hybrid X95A949	Pioneer Hi Bred International Inc	11	hybrid
US-8546668-B1	Maize variety hybrid X95B333	Pioneer Hi Bred International Inc	11	hybrid
US-8044278-B1	Maize variety inbred PH13JD	Pioneer Hi-Bred International Inc.	9	inbred
US-8058524-B1	Maize variety inbred PHW6G	Pioneer Hi-Bred International Inc.	9	inbred
US-8044282-B1	Maize variety PH12K5	Pioneer Hi-Bred International Inc.	9	inbred
US-7820892-B1	Maize variety PHF0D	Pioneer Hi-Bred International Inc.	8	inbred
US-8049080-B1	Maize variety PHPAR	Pioneer Hi-Bred International Inc.	8	inbred
US-7767889-B1	Maize variety PHPCW	Pioneer Hi-Bred International Inc.	8	inbred
US-7935873-B1	Maize variety PHR1J	Pioneer Hi-Bred International Inc.	8	inbred
US-8035005-B1	Maize variety PHVAM	Pioneer Hi-Bred International Inc.	8	inbred
US-7932447-B1	Maize variety PHW2Z	Pioneer Hi-Bred International Inc.	8	inbred
US-8039702-B1	Maize variety X6M530	Pioneer Hi-Bred International Inc.	8	inbred
US-6184444-B1	Inbred maize line NP2115	Novartis Ag	99	inbred
US-6204438-B1	Inbred maize line NP2141	Novartis Ag	99	inbred
US-5536900-A	Inbred corn line	Ciba-Geigy Corporation	91	inbred
US-6803509-B2	Inbred corn line 9SM990	Curry Seeds	2	inbred
US-6909036-B2	Inbred corn line BX20010	Syngenta Seeds Ag	2	inbred
US-6909037-B2	Inbred corn line BX20033	Syngenta Seeds Ag	2	inbred
US-5457276-A	Inbred corn line CG00637	Ciba-Geigy Corporation	91	inbred
US-5723721-A	Inbred corn line CG00685 use thereof	Novartis Corporation	93	inbred
US-5731506-A	Inbred corn line CG00766	Novartis Corporation	95	inbred
US-5569826-A	Inbred corn line designated ZS0114	Zeneca Limited	94	inbred
US-5569813-A	Inbred corn line designated ZS0223	Zeneca Limited	94	inbred
US-5585533-A	Inbred corn line designated ZS0560	Zeneca Limited	94	inbred
US-5585534-A	Inbred corn line designated ZS0853	Zeneca Limited	94	inbred
US-5585541-A	Inbred corn line designated ZS1513	Zeneca Limited	94	inbred
US-6815593-B2	Inbred corn line G0302	Advanta Technology, Ltd.	2	inbred
US-7094954-B2	Inbred corn line G0502	Syngenta (At) Limited	2	inbred
US-2007180557-A1	Inbred corn line G06-NP2405	David Uhr	6	inbred
US-7368641-B2	Inbred corn line G06-NP2414	Syngenta Participations Ag	6	inbred
US-7371942-B2	Inbred corn line G06-NP2482	Syngenta Participation	6	inbred
US-7534942-B2	Inbred corn line G06-NP2536	Syngenta Participations Ag	6	inbred
US-7378580-B2	Inbred corn line G06-NP2546	Syngenta Participations Ag	6	inbred
US-7435884-B1	Inbred corn line G06-NP2593	Bruce Skillings	6	inbred
US-7390943-B1	Inbred corn line G06-NP2598	Syngenta Participation Ag	6	inbred
US-7388138-B1	Inbred corn line G06-NP2608	Syngenta Participations Ag	6	inbred
US-7323626-B1	Inbred corn line G06-NP2623	Syngenta Participations Ag	6	inbred
US-7390944-B1	Inbred corn line G06-NP2739	Syngeata Participations Ag	6	inbred
US-7368642-B1	Inbred corn line G06-NP2743	Syngenta Paricipations Ag	6	inbred
US-7326834-B1	Inbred corn line G06-NP2744	Syngenta Participations Ag	6	inbred
US-7371943-B1	Inbred corn line G06-NP2760	Syngenta Participations Ag	6	inbred
US-7351889-B1	Inbred corn line G06-NP2873	Syngenta Participations Ag	6	inbred
US-7399913-B1	Inbred corn line G06-NP2899	Syngenta Participations Ag	6	inbred
US-7348474-B1	Inbred corn line G06-NP2907	Syngenta Participations Ag	6	inbred
US-7145061-B1	Inbred corn line G0603	Syngenta (At) Limited	3	inbred
US-7411119-B1	Inbred corn line G07-NP2457	Syngenta Participations Ag	7	inbred
US-7414182-B1	Inbred corn line G07-NP2580	Lee Stromberg	7	inbred
US-7642425-B1	Inbred corn line G07-NPAF3455	Syngenta Participations Ag	7	inbred
US-7414183-B1	Inbred corn line G07-NPAF5359	Syngenta Participations Ag	7	inbred
US-7615691-B1	Inbred corn line G07-NPAX5290	Syngenta Participations Ag	7	inbred
US-7732681-B1	Inbred corn line G07-NPDI3004	Syngenta Participations, Ag	7	inbred
US-7671257-B1	Inbred corn line G07-NPDI4214	Syngenta Participations Ag.	7	inbred
US-7663030-B1	Inbred corn line G07-NPFA7183	Syngenta Participation Ag	7	inbred
US-7667108-B1	Inbred corn line G07-NPFA7278	Syngenta Participations Ag	7	inbred
US-7705217-B1	Inbred corn line G07-NPFF6309	Syngenta Participations Ag	7	inbred
US-7737339-B1	Inbred corn line G07-NPIC3423	Syngenta Participations, Ag	7	inbred
US-7741544-B1	Inbred corn line G07-NPIC3426	Syngenta Participations, Ag	7	inbred
US-7790968-B1	Inbred corn line G07-NPID2449	Syngenta Participations Ag	7	inbred
US-7737337-B1	Inbred corn line G07-NPID3260	Syngenta Participations, Ag	7	inbred
US-7795512-B1	Inbred corn line G07-NPID4373	Syngenta Participations Ag	7	inbred
US-7635807-B1	Inbred corn line G07-NPID4480	Syngenta Participations Ag	7	inbred
US-7732682-B1	Inbred corn line G07-NPID4586	Syngenta Participations, Ag	7	inbred
US-7763781-B1	Inbred corn line G07-NPID5459	Syngenta Participations Ag	7	inbred
US-7642426-B1	Inbred corn line G07-NPXA5489	Syngenta Participations Ag	7	inbred
US-7642427-B1	Inbred corn line G07-NPXA5599	Syngenta Participations Ag	7	inbred
US-7820890-B1	Inbred corn line G07-NPXA6496	Syngenta Participations Ag	7	inbred
US-7273974-B1	Inbred corn line G0805	Syngenta (At) Limited	5	inbred
US-6984779-B1	Inbred corn line G1103	Syngenta(At) Limited	3	inbred
US-7470837-B1	Inbred corn line G1105	Syngenta Participations Ag	5	inbred
US-6815594-B2	Inbred corn line G1202	Advanta Technology Ltd.	2	inbred
US-6420635-B1	Inbred corn line G1500	Bradley Allen Sockness	0	inbred
US-7205463-B1	Inbred corn line G1505	Syngenta (At) Limited	5	inbred
US-7060880-B1	Inbred corn line G1704	Garst Seed Company	4	inbred
US-6441279-B1	Inbred corn line G1900	Advanta Technology Ltd.	0	inbred
US-6818812-B2	Inbred corn line G2202	Advanta Technology Ltd.	2	inbred
US-6426453-B1	Inbred corn line G3000	Advanta Technology Ltd.	0	inbred
US-2004098768-A1	Inbred corn line g3001	Dick Stelpflug	1	inbred
US-6849790-B2	Inbred corn line G3601	Advanta Technology, Ltd.	1	inbred
US-7091405-B1	Inbred corn line G4803	Syngenta (At) Limited	3	inbred
US-7411116-B1	Inbred corn line G5205	Syngenta Participations Ag	5	inbred
US-6979765-B1	Inbred corn line G6103	Syngenta (At) Limited	3	inbred
US-7247776-B1	Inbred corn line G7403	Syngenta (At) Limited	3	inbred
US-7358426-B1	Inbred corn line G7905	Syngenta (At) Limited	5	inbred
US-7498493-B1	Inbred corn line GH05-60231	Syngenta Participations Ag	5	inbred
US-6040506-A	Inbred corn line HX621	Hoegemeyer Hybrid	99	inbred
US-6040507-A	Inbred corn line HX622	Hoegemeyer Hybrid	99	inbred
US-6043416-A	Inbred corn line HX740	Hoegemeyer Hybrid	99	inbred
US-2004068771-A1	Inbred corn line HX879	Hoegemeyer Thomas Christian	2	inbred
US-6833500-B2	Inbred corn line HX894	Hoegemeyer Hybrids	2	inbred
US-6483014-B1	Inbred corn line NP 2010	Syngenta Participations Ag	97	inbred
US-5824852-A	Inbred corn line NP 2013	Novartis Finance Corporation	97	inbred
US-6187999-B1	Inbred corn line NP 2017	Novartis Ag	97	inbred
US-5811645-A	Inbred corn line NP 2045	Novartis Finance Corporation	97	inbred
US-5728924-A	Inbred corn line NP 934	Henson; Allen R.	95	inbred
US-5731503-A	Inbred corn line NP 948	Novartis Corporation	94	inbred
US-5792905-A	Inbred corn line NP 982	Novartis Corporation	95	inbred
US-6156957-A	Inbred corn line NP 991	Novartis Ag	95	inbred
US-5817914-A	Inbred corn line NP 993	Novartis Finance Corporation	95	inbred
US-8524995-B1	Inbred corn line NPAF3107	Syngenta Participations Ag	10	inbred
US-7737338-B1	Inbred corn line NPAF4467	Syngenta Participations, Ag	8	inbred
US-8524994-B1	Inbred corn line NPAF4543	Syngenta Participations Ag	9	inbred
US-8143502-B1	Inbred corn line NPAQ1505	Syngenta Participations Ag	9	inbred
US-8258379-B1	Inbred corn line NPCI6621	Syngenta Participations Ag	9	inbred
US-7960623-B1	Inbred corn line NPCJ6052	Syngenta Participations A.G.	9	inbred
US-8530728-B1	Inbred corn line NPDC5592	Syngenta Participations Ag	10	inbred
US-8168870-B1	Inbred corn line NPDI4014	Syngenta Participations Ag	8	inbred
US-8420912-B1	Inbred corn line NPFA4212GT21	Syngenta Participations Ag	10	inbred
US-8222499-B1	Inbred corn line NPFA4734	Syngenta Participations Ag	8	inbred
US-8420907-B1	Inbred corn line NPFA5849	Syngenta Participations Ag	10	inbred
US-8519236-B1	Inbred corn line NPFF6228	Syngenta Participations Ag	10	inbred
US-8507767-B1	Inbred corn line NPFX4376	Syngenta Participations Ag	10	inbred
US-8252990-B1	Inbred corn line NPFX6099	Syngenta Participations Ag	10	inbred
US-8395030-B1	Inbred corn line NPFX7012	Syngenta Participations Ag	9	inbred
US-8008556-B1	Inbred corn line NPFX8091	Syngenta Participation Ag.	10	inbred
US-8143503-B1	Inbred corn line NPFX8213	Syngenta Participations Ag	9	inbred
US-8389821-B1	Inbred corn line NPID2001	Syngenta Participations Ag	10	inbred
US-8203052-B1	Inbred corn line NPID2568	Syngenta Participations Ag	9	inbred
US-8227672-B1	Inbred corn line NPID3594	Syngenta Participations Ag	8	inbred
US-8003863-B1	Inbred corn line NPID3606	Syngenta Participations Ag	9	inbred
US-8212129-B1	Inbred corn line NPID3757	Syngenta Participations Ag	9	inbred
US-8017843-B1	Inbred corn line NPID4466	Syngenta Participations Ag	9	inbred
US-8203053-B1	Inbred corn line NPID4571	Syngenta Participations Ag	8	inbred
US-8008554-B1	Inbred corn line NPID4789	Syngenta Participations Ag	9	inbred
US-8420913-B1	Inbred corn line NPID5198BT11/CRW604	Syngenta Participations Ag	10	inbred
US-8143501-B1	Inbred corn line NPID7031	Syngenta Participations Ag	9	inbred
US-8178760-B1	Inbred corn line NPIE6267	Syngenta Participations Ag	8	inbred
US-8420914-B1	Inbred corn line NPIJ7011Bt11/CRW604	Syngenta Participations Ag	10	inbred
US-8519237-B1	Inbred corn line NPIJ7516	Syngenta Participations Ag	10	inbred
US-8008557-B1	Inbred corn line NPJC7538	Syngenta Participations A.G.	9	inbred
US-8258378-B1	Inbred corn line NPLC8632	Syngenta Participations Ag	8	inbred
US-8420915-B1	Inbred corn line NPXO5745GT21	Syngenta Participations Ag	10	inbred
US-6835879-B2	Inbred corn line WICY418C	Syngenta Seeds, Inc.	1	inbred
US-5723725-A	Inbred corn line ZS01101	Garst Seed Company	96	inbred
US-5866763-A	Inbred corn line ZS01220	Zenco (No. 4) Limited	96	inbred
US-5936144-A	Inbred corn line ZS01231	Rufener, Ii; George Keith	97	inbred
US-5763753-A	Inbred corn line ZS01262	Garst Seed Company	96	inbred
US-5780705-A	Inbred corn line ZS01301	Witherspoon; David, Deutsch; Jim	96	inbred
US-5723727-A	Inbred corn line ZS01429	Garst Seed Company	96	inbred
US-5723730-A	Inbred corn line ZS01595	Garst Seed Company	96	inbred
US-5723728-A	Inbred corn line ZS01819	Garst Seed Company	96	inbred
US-6353158-B1	Inbred corn line ZS02234	Garst Seed Company	97	inbred
US-6384303-B1	Inbred corn line ZS02338	Michael Buendgen	97	inbred
US-6329578-B1	Inbred corn line ZS02433	Advanta Technology Limited	98	inbred
US-6172284-B1	Inbred corn line ZS02461	Anthony Maves	97	inbred
US-5912420-A	Inbred corn line ZS03940	Huang; Tzao Fen	97	inbred
US-5952551-A	Inbred corn line ZS09247	Stelpflug; Richard S.	97	inbred
US-5602314-A	Inbred corn line ZS1022	Zenco (No. 4) Limited	95	inbred
US-5602315-A	Inbred corn line ZS1202	Zenco (No. 4) Limited	95	inbred
US-5569820-A	Inbred corn line ZS1284	Zeneca Limited	95	inbred
US-5589606-A	Inbred corn line ZS1679	Zenco (No. 4) Limited	95	inbred
US-5602316-A	Inbred corn line ZS1783	Zenco (No 4) Limited	95	inbred
US-5585539-A	Inbred corn line ZS1791	Zeneca Limited	95	inbred
US-6121525-A	Inbred corn line ZS4199	Advanta Technology Limited	99	inbred
US-5763752-A	Inbred corn line ZSO1602	Garst Seed Company	96	inbred
US-5625131-A	Inbred corn line ZSO541	Zenco (No. 4) Limited	95	inbred
US-6573438-B1	Inbred Maize line 2044BT	Syngenta Participations Ag	97	inbred
US-7041884-B2	Inbred maize line 291B	Syngenta Participations Ag	3	inbred
US-2004139491-A1	Inbred maize line 366C	Plaisted Douglas C., Grier Stephen Lambert, Gardiner Michele L.	3	inbred
US-2004123352-A1	Inbred maize line 402A	Plaisted Douglas C., Grier Stephen Lambert, Gardiner Michele L.	2	inbred
US-7049498-B2	Inbred maize line 413A	Syngenta Participations Ag	3	inbred
US-5728923-A	Inbred maize line CG3ND97	Miller; Robert	96	inbred
US-5731501-A	Inbred maize line CG4NU15	Novartis Corporation	96	inbred
US-5728922-A	Inbred maize line CG5NA01	Novartis Corporation	96	inbred
US-5731500-A	Inbred maize line CG5NF22	Novartis Corporation	96	inbred
US-6657109-B1	Inbred maize line NP2015	Syngenta Participations Ag	99	inbred
US-6072110-A	Inbred maize line NP2029	Novartis Ag	99	inbred
US-6169233-B1	Inbred maize line NP2031	Novartis Ag	99	inbred
US-6723901-B1	Inbred maize line NP2052	Syngenta Participations Ag	0	inbred
US-6646187-B2	Inbred maize line NP2073	Syngenta Participations Ag	1	inbred
US-6316701-B1	Inbred maize line NP2138	Syngenta Participations Ag	99	inbred
US-6140563-A	Inbred maize line NP2151	Novartis Ag	99	inbred
US-6759579-B2	Inbred maize line NP2171	Syngenta Participations Ag	1	inbred
US-6844489-B2	Inbred maize line NP2174	Syngenta Participations Ag	1	inbred
US-6166304-A	Inbred maize line NP2208	Novartis Ag	99	inbred
US-6353159-B1	Inbred maize line NP2213	Syngenta Participations Ag	99	inbred
US-6710233-B2	Inbred maize line NP2222	Syngenta Participations Ag	2	inbred
US-6706955-B2	Inbred maize line NP2276	Syngenta Participations Ag	2	inbred
US-2004143866-A1	Inbred maize line NP2315	Brent Delzer	3	inbred
US-6740797-B2	Inbred maize line NP2316	Syngenta Participations Ag	2	inbred
US-7166783-B2	Inbred maize line NP2391	Syngenta Participations Ag	4	inbred
US-7122726-B2	Inbred maize line NP2460	Syngenta Participations Ag	4	inbred
US-7157631-B2	Inbred maize line NP2467	Syngenta Participations Ag	5	inbred
US-6399860-B1	Inbred maize line R327H	Novartis Ag	97	inbred
US-5731502-A	Inbred maize lines CG5NA58 and CG5NA58A	Novartis Corporation	96	inbred
US-8878013-B1	Inbred melon lines ME007 and ME009	Syngenta Participations Ag	14	inbred
US-6188003-B1	Inbred sweet corn line	Novartis Ag	99	inbred
US-2007300316-A1	Inbred sweet corn line R327F	Syngenta Participations Ag	6	inbred
US-7812228-B2	Inbred sweet corn line R373B	Syngenta Participations Ag	6	inbred
US-7816588-B2	Inbred sweet corn line R373D	Syngenta Participations Ag	7	inbred
US-6034306-A	Inbred sweet corn line R398D	Novartis Ag	99	inbred
US-2006195933-A1	Inbred sweet corn line R420B	Syngenta Participations Ag	5	inbred
US-7804012-B2	Inbred sweet corn line R605	Syngenta Participations Ag	7	inbred
US-7812229-B2	Inbred sweet corn line R629	Syngenta Participations Ag	6	inbred
US-2002178471-A1	Inbred sweet corn line R659	Plaisted Douglas C., Grier Stephen L., Wesley Houghton	1	inbred
US-2007294791-A1	Inbred sweet corn line R660K	Syngenta Participations Ag	6	inbred
US-5990395-A	Inbred sweet corn line W1498A	Novartis Ag	99	inbred
US-8853505-B2	Variety corn line AA2205	Syngenta Participations Ag	12	inbred
US-9078409-B2	Variety corn line AF3242	Syngenta Participations Ag	13	inbred
US-9480218-B2	Variety corn line AF3605	Syngenta Participations Ag	13	inbred
US-9301467-B2	Variety corn line AX3611	Syngenta Participations Ag	13	inbred
US-10021847-B1	Variety corn line CI5166	Syngenta Participations Ag	17	inbred
US-9872451-B2	Variety corn line CJ6085	Syngenta Participations Ag	15	inbred
US-2014245480-A1	Variety corn line cj6328	Syngenta Participations Ag	13	inbred
US-9035144-B2	Variety corn line DC4016YD	Syngenta Participations Ag	12	inbred
US-9320220-B2	Variety corn line FA4172	Syngenta Participations Ag	13	inbred
US-9635824-B1	Variety corn line FA4346	Syngenta Participations Ag	15	inbred
US-9615527-B1	Variety corn line FA6133	Syngenta Participations Ag	15	inbred
US-9338997-B1	Variety corn line FA7656	Syngenta Participations Ag	14	inbred
US-9730410-B2	Variety corn line FB6455	Syngenta Participations Ag	15	inbred
US-8853504-B2	Variety corn line FF5130	Syngenta Participations Ag	12	inbred
US-9332700-B2	Variety corn line FF6224	Syngenta Participations Ag	12	inbred
US-8946527-B2	Variety corn line FF6788	Syngenta Participations Ag	12	inbred
US-9040790-B2	Variety corn line FF7354	Syngenta Participations Ag	12	inbred
US-9992966-B1	Variety corn line FX6134	Syngenta Participations Ag	17	inbred
US-9480220-B2	Variety corn line FX6156	Syngenta Participations Ag	13	inbred
US-9040789-B2	Variety corn line FX6815	Syngenta Participations Ag	12	inbred
US-9040785-B2	Variety corn line FX8609	Syngenta Participations Ag	12	inbred
US-9345216-B1	Variety corn line GAA2020	Syngenta Participations Ag	14	inbred
US-9635826-B1	Variety corn line GAB2009	Syngenta Participation Ag	15	inbred
US-9756811-B2	Variety corn line GAB2010	Syngenta Participations Ag	15	inbred
US-9332705-B2	Variety corn line GAB2601	Syngenta Particiations AG	13	inbred
US-10058048-B2	Variety corn line GAQ2004	Syngenta Participations Ag	16	inbred
US-9258961-B2	Variety corn line GAQ2011	Syngenta Participations Ag	13	inbred
US-9380755-B2	Variety corn line GAQ2016	Syngenta Participations Ag	14	inbred
US-10004195-B2	Variety corn line GAQ2025	Syngenta Participations Ag	15	inbred
US-9730421-B1	Variety corn line GAQ2027	Syngenta Participations Ag	16	inbred
US-9504218-B2	Variety corn line GAV0001	Syngenta Participations Ag	14	inbred
US-9737038-B1	Variety corn line GAV0002	Syngenta Participations Ag	16	inbred
US-9730422-B1	Variety corn line GID2034	Syngenta Participations Ag	16	inbred
US-9338994-B1	Variety corn line GID2112	Syngenta Participations Ag	14	inbred
US-9615522-B2	Variety corn line GNA0098ZL	Syngenta Participations Ag	13	inbred
US-10098312-B2	Variety corn line GQA1001	Syngenta Participations Ag	16	inbred
US-9301468-B2	Variety corn line HAF4561	Syngenta Participations Ag	13	inbred
US-9282701-B2	Variety corn line HBA2544	Syngenta Participations Ag	13	inbred
US-9339000-B1	Variety corn line HBA2631	Syngenta Participations Ag	14	inbred
US-9271459-B2	Variety corn line HDI4942	Syngenta Participations Ag	13	inbred
US-9788506-B2	Variety corn line HID3190	Syngenta Participations Ag	15	inbred
US-9301466-B2	Variety corn line HID3259	Syngenta Participations Ag	13	inbred
US-9545074-B2	Variety corn line HID3464	Syngenta Participations Ag	14	inbred
US-9035145-B2	Variety corn line HID3483	Syngenta Participations Ag	12	inbred
US-9585320-B2	Variety corn line HID3634	Syngenta Participations Ag	14	inbred
US-9332715-B1	Variety corn line HID3753	Syngenta Participations Ag	14	inbred
US-9338990-B2	Variety corn line HID3780	Syngenta Participations Ag	13	inbred
US-9591821-B2	Variety corn line HID4488	Syngenta Participations Ag	14	inbred
US-9538719-B2	Variety corn line HID4731	Syngenta Participations Ag	14	inbred
US-9545066-B2	Variety corn line HID4869	Syngenta Participations Ag	13	inbred
US-9591826-B1	Variety corn line IAX3317	Syngenta Participations Ag	15	inbred
US-9338995-B1	Variety corn line IAX3405	Syngenta Participations Ag	14	inbred
US-9504217-B2	Variety corn line IAX3489	Syngenta Participations Ag	13	inbred
US-9338998-B1	Variety corn line IAX4438	Syngenta Participations Ag	14	inbred
US-9149014-B2	Variety corn line ID2516	Syngenta Participations Ag	13	inbred
US-9204600-B2	Variety corn line ID3517	Syngenta Participations Ag	12	inbred
US-9072237-B2	Variety corn line ID3633	Syngenta Participations Ag	13	inbred
US-9338996-B1	Variety corn line ID3636	Syngenta Participations Ag	14	inbred
US-9585319-B2	Variety corn line ID3645	Syngenta Participations Ag	14	inbred
US-9504219-B2	Variety corn line ID3659	Syngenta Participations Ag	14	inbred
US-9301469-B2	Variety corn line ID3823	Syngenta Participations Ag	14	inbred
US-9730423-B1	Variety corn line ID3881	Syngenta Participations Ag	16	inbred
US-9763404-B2	Variety corn line ID4402	Syngenta Participations Ag	15	inbred
US-9320221-B2	Variety corn line ID5754	Syngenta Participations Ag	14	inbred
US-9161504-B2	Variety corn line ID6053	Syngenta Participations Ag	12	inbred
US-9635825-B1	Variety corn line ID6461	Syngenta Participations Ag	15	inbred
US-9468170-B2	Variety corn line ID6708	Syngenta Participations Ag	13	inbred
US-8802944-B2	Variety corn line IH6506	Syngenta Participations Ag	12	inbred
US-9480221-B2	Variety corn line IID3422	Syngenta Participations Ag	13	inbred
US-9232705-B2	Variety corn line IID3528	Syngenta Participations Ag	12	inbred
US-9717214-B1	Variety corn line IID5449	Syngenta Participations Ag	16	inbred
US-10039257-B1	Variety corn line IIJ6395	Syngenta Participations Ag	17	inbred
US-9615528-B1	Variety corn line IJ7331	Syngenta Participations Ag	15	inbred
US-9426952-B2	Variety corn line IQ1883	Syngenta Participations Ag	13	inbred
US-9338989-B2	Variety corn line JDC7199	Syngenta Participations Ag	13	inbred
US-9338991-B2	Variety corn line JFF6785	Syngenta Participations Ag	13	inbred
US-9282700-B2	Variety corn line JH6530	Syngenta Participations Ag	13	inbred
US-9788518-B1	Variety corn line JII6578	Syngenta Participations Ag	16	inbred
US-9338999-B1	Variety corn line KCI7538	Syngenta Participations Ag	14	inbred
US-8710327-B2	Variety corn line KDC7040	Syngenta Participations Ag	12	inbred
US-9035155-B2	Variety corn line KDL6289	Syngenta Participations Ag	13	inbred
US-9462764-B2	Variety corn line KFX5857	Syngenta Participations Ag	13	inbred
US-9198369-B2	Variety corn line KIJ7023	Syngenta Participations Ag	12	inbred
US-9035154-B2	Variety corn line KLI6131	Syngenta Participations Ag	13	inbred
US-8642851-B2	Variety corn line LC6108	Syngenta Participations Ag	12	inbred
US-9737009-B2	Variety corn line LCI7002	Syngenta Participations Ag	15	inbred
US-8853506-B2	Variety corn line LFX6244	Syngenta Participations Ag	12	inbred
US-8710328-B2	Variety corn line LIC7382	Syngenta Participations Ag	12	inbred
US-9700011-B1	Variety corn line LJL6799	Syngenta Participations Ag	16	inbred
US-9072238-B2	Variety corn line LLD7345	Syngenta Participations Ag	13	inbred
US-9040786-B2	Variety corn line MFX7589	Syngenta Participations Ag	12	inbred
US-9615529-B1	Variety corn line MFX7747	Syngenta Participations Ag	15	inbred
US-9062325-B2	Variety corn line MFX7805	Syngenta Participations Ag	13	inbred
US-9795108-B1	Variety corn line MFX8095	Syngenta Participations Ag	16	inbred
US-9795107-B1	Variety corn line MIJ6485	Syngenta Participations Ag	16	inbred
US-8710334-B2	Variety corn line NPAA2675	Syngenta Participations Ag	11	inbred
US-8710335-B2	Variety corn line NPAA2720	Syngenta Participations Ag	11	inbred
US-8642855-B2	Variety corn line NPAA3320	Syngenta Participations Ag	11	inbred
US-8492620-B1	Variety corn line NPAA3676	Syngenta Participations Ag	10	inbred
US-8847039-B2	Variety corn line NPCJ7895	Syngenta Participations Ag	11	inbred
US-8466355-B1	Variety corn line NPDC6326	Syngenta Participations Ag	11	inbred
US-8507769-B1	Variety corn line NPFA4824	Syngenta Participations Ag	10	inbred
US-8481825-B1	Variety corn line NPFA6896	Syngenta Participations Ag	11	inbred
US-8742233-B2	Variety corn line NPFA6899	Syngenta Participations Ag	11	inbred
US-8609961-B2	Variety corn line NPFB7193	Syngenta Participations Ag	11	inbred
US-8519238-B1	Variety corn line NPFX5428	Syngenta Participations Ag	11	inbred
US-8614377-B2	Variety corn line NPFX6247	Syngenta Participations Ag	11	inbred
US-8642856-B2	Variety corn line NPFX6645	Syngenta Participations Ag	11	inbred
US-8653344-B2	Variety corn line NPFX7687	Syngenta Participations Ag	11	inbred
US-8481827-B1	Variety corn line NPFX7789	Syngenta Participations Ag	11	inbred
US-8507770-B1	Variety corn line NPHD1001	Syngenta Participations Ag	11	inbred
US-2013024989-A1	Variety Corn Line NPIC3821	Scott Kelly	11	inbred
US-8637750-B2	Variety corn line NPID3013	Syngenta Participations Ag	11	inbred
US-8614379-B2	Variety corn line NPID3216	Syngenta Participations Ag	11	inbred
US-8791346-B2	Variety corn line NPID3649	Syngenta Participations Ag	11	inbred
US-8642857-B2	Variety corn line NPID3719	Syngenta Participations Ag	11	inbred
US-8614380-B2	Variety corn line NPID5702	Syngenta Participations Ag	11	inbred
US-8847038-B2	Variety corn line NPID6897	Syngenta Participations Ag	11	inbred
US-8802942-B2	Variety corn line NPID7052	Syngenta Participations Ag	11	inbred
US-8642849-B2	Variety corn line NPID7487	Syngenta Participations Ag	11	inbred
US-8497414-B1	Variety corn line NPID7544	Syngenta Participations Ag	10	inbred
US-8853503-B2	Variety corn line NPIQ4345	Syngenta Participations Ag	11	inbred
US-8754307-B2	Variety corn line NPJC6794	Syngenta Particpations Ag	11	inbred
US-8847040-B2	Variety corn line NPLC8356	Syngenta Participations Ag	11	inbred
US-8847041-B2	Variety corn line NPLI7060	Syngenta Participations Ag	11	inbred
US-8847037-B2	Variety corn line NPLI7499	Syngenta Participations Ag	11	inbred
US-8481826-B1	Variety corn line NPNA0001	Syngenta Participations Ag	11	inbred
US-8735691-B2	Variety corn line NPNA0003	Syngenta Participations Ag	11	inbred
US-8476506-B1	Variety corn line NPXF5467	Syngenta Participations Ag	11	inbred
US-9730409-B2	Variety corn line XF5318	Syngenta Participations Ag	15	inbred
US-8802943-B2	Variety corn line XF6752	Syngenta Participations Ag	12	inbred
